# Supplementary material for: Understanding HIV-Mycobacteria synergism through comparative proteomics of intra-phagosomal mycobacteria during mono- and HIV co-infection
Source: PubMed Central journal article supplement (PMC4768096; doi:10.1038/srep22060), 2016-02-26
Supplement: srep22060-s1.pdf [file srep22060-s1.pdf]

**Understanding HIV-*Mycobacteria* synergism through comparative proteomics of intraphagosomal mycobacteria during mono- and HIV co-infection**

Rakesh Ganji<sup>a</sup>, Snigdha Dhali<sup>b#</sup>, Arshad Rizvi<sup>a#</sup>, Srikanth Rapole<sup>b</sup>, Sharmistha Banerjee<sup>a\*</sup>

<sup>a</sup>Department of Biochemistry, School of Life Sciences, University of Hyderabad, Hyderabad, Telangana State, India.

<sup>b</sup>National Centre for Cell Science, Pune, Maharashtra, India.

#Authors have contributed equally.

\*To whom correspondence should be addressed:

Dr. Sharmistha Banerjee, Department of Biochemistry, School of Life Sciences, University of Hyderabad, Hyderabad, Telangana State, India-500046

Tel: (+91)-40-66794573; Fax: (+91)-40-23010120 Email: [sbsl@uohyd.ernet.in](mailto:sbsl@uohyd.ernet.in)

## **Methods:**

### **Growth conditions of *Mycobacteria*:**

The mycobacteria were plated on 7H10 agar media (Hi-media, India) supplemented with 10% Oleic acid, Albumin, Dextrose and Catalase (OADC, Hi-Media, India). The plate was incubated at 37°C for 15 days. The colonies were picked into the 7H9 broth media supplemented with 10% OADC and the broth culture was incubated at 37°C at 180 rpm until the OD<sub>600 nm</sub> reached 0.8 to 1. The culture was checked for any contamination using Ziehl-Neelsen (ZN) staining procedure. Prior to the infection, centrifuged the bacterial suspension at 200 ×g for 10 min and washed the bacterial pellet with PBS and then with RPMI 1640 media. Suspension of single-bacillus was obtained by passing the suspension through 26G 1 mL syringe for 10-20 times and then withdrew from the top of the tube.

### **Preparation and quantification of infectious HIV-1 (ADA8) particles:**

Infectious HIV-1 particles were prepared by transfection of proviral DNA pNL-ADA8 into HEK293T cells by calcium phosphate method. Culture supernatants were collected at intervals of 24 hours post-transfection, filtered through 0.45 µm syringe filter (Millipore, USA), precipitated using Polyethylene glycol (Kutner, Zhang et al. 2009; Banerjee, Benjamin et al. 2014) and quantified by HIV-1 p24 ELISA kit (Advanced BioScience Laboratories Inc, USA) according to the manufacturer's protocol. Cells were infected with 30 ng/mL of p24 equivalents of HIV.

### **Infection of macrophages and phagosome isolation:**

THP-1 cells were PMA (10 ng/mL) differentiated to macrophages in RPMI 1640 media with 10% FBS in 150 mm culture dishes. After 24 hrs the macrophages were washed, fresh media was added and kept for 48 hrs rest. The macrophages were divided into two categories 1) for co-infection: First infected with HIV for 2 hrs in incomplete RPMI media and followed by 24 hr incubation in complete RPMI media. This was followed by infection with BCG at an MOI=100 for 4 hrs which was modified from the protocol described earlier (Lee, Jethwaney et al. 2010). The cells were extensively washed to remove the extracellular mycobacteria and also HIV particles to ensure that the differences observed in mycobacterial counts or HIV titers was due to mycobacterial mono- or co-infection. 2) For mono-infection: The cells were treated similar to co-infection but without virus and followed by BCG infection. After 4 hrs of infection, fresh media with antibiotic was added and incubated for 24 hrs. The phagosomes enter late endosome state at 24 hr post infection. After 24 hrs the cells were harvested for fractionation to obtain enriched bacteria-laden phagosomes which was standardized in our laboratory using sucrose density gradient method as described earlier (Wandy Beatty and Russell 2001).

### **Sample preparation and LC-MALDI-MS/MS Analyses:**

Total 500 µg of phagosome protein was trypsinized in each category (BCG laden phagosomes and HIV-BCG laden phagosomes) in presence of 0.1% SDS overnight at 37°C. The sample was then subjected to detergent removal using detergent removal spin columns (Thermo scientific Pierce, USA). A total of 2.5 µg digested peptides were separated using a Tempo Nano MDLC system (Eksigent) with 0.5 mm × 2 mm CapTrap™ C18 PepMap guard column (MichromBioresources, Auburn CA) and an Agilent 300 SB C18 0.075 µm × 150 mm, 3.5 µm, 300 Å Nano column (Agilent Technologies). The trap column was washed for 40 min with 0.1%

aqueous TFA/2% Acetonitrile (ACN) at a flow rate of 15  $\mu$ L/min. The Nano LC system was operated at a flow rate of 300 nL/min. Desalted peptides were eluted using 98% water/2% ACN/0.1% TFA (Buffer A) and 2% water/98% ACN/0.1% TFA (Buffer B) with the following gradient: 5–50% B in 115 min, increase to 90% B in 12 min, decrease to 5% B in 13 min and equilibration at 5% B for 10 min. The eluent was mixed with MALDI matrix at 800 nL/min flow rate solution (2.5 mg/mL  $\alpha$ -cyano-4-hydroxycinnamic acid [CHCA] in 80% ACN + 0.1% TFA) using a Ekspot Spotter (Eksigent) and spotted onto 28  $\times$  44 spot arrays on 123 mm  $\times$  81 mm Opti-TOF LC/MALDI inserts (AB SCIEX). Spotting time was from 15 to 150 minutes, with 20 s spot intervals.

#### **MALDI-TOF/TOF Analyses:**

MS spectra were acquired on an AB SCIEX MALDI-TOF/TOF 4800 mass spectrometer equipped with a 200 Hz repetition rate Nd: YAG laser in positive ion mode in the mass range of 800–4000 m/z and 900 laser shots accumulation. MS spectra were internally calibrated using 4700 Proteomics Analyzer Standards Kit containing 6 peptide mix to 50 ppm accuracy. Laser intensity was set to 4000 for MS and 4600 for MS/MS acquisition. Precursor selection for MS/MS analysis was done by the 4000 Series Explorer Software (AB SCIEX, Darmstadt, Germany) in the strongest precursor first selection order using the following criteria: minimum S/N ratio, 60; maximum precursors per spot, 18. All MS/MS spectra were acquired with 2 kV collision energy by accumulation of 2500 laser shots.

#### **Peptide Identification:**

The data was analysed using GPS Explorer software (AB SCIEX) using MASCOT search engine in *Mycobacterium tuberculosis* complex taxonomy with following parameters: MS tolerance: 150ppm; MS/MS tolerance: 0.5Da; Enzyme used: Trypsin; Fixed modification: carbamidomethyl; Variable modification: oxidation (methionine), Deamidation (N,Q). We have reported only those proteins with a protein identification confidence interval of  $\geq 95\%$  ( $p < 0.05$ ).

#### **Statistical Analyses:**

All the experiments were performed at the least three times. The data were analysed using SigmaPlot software version 11.0.0.77 (Systat Software, Inc., USA). The error bars represent the standard deviation (SD) from the mean of at least three independent experiments. Statistical analyses of the experimental data for comparing two groups were performed by Student's *t*-test.  $p < 0.05$  was considered as significant. \* in the figures represent  $p < 0.05$  and \*\* represents  $p < 0.001$ .

## Supplementary data:

### Figure S1:

Western blot using anti-His antibody confirming the expression His-tagged IdeR in *M. smegmatis*. Lanes: Cell lysates of 1-Vector control *M. smegmatis*-pVV16; 2-*M. smeg* $\Delta$ *IdeR*; 3-protein marker; 4 and 5-*M. smeg* $\Delta$ *IdeR*-pVV-IdeR. (B) The growth curve of *M. smeg* $\Delta$ *IdeR* along with the corresponding vector control and mutant complemented strain. (C) The growth curve of *M. smeg*-pVV-VapC48 along with the corresponding vector control.

### Table S1:

Mycobacterial proteins identified from the LC-MALDI-MS/MS of the phagosome-enriched fractions from BCG infected cells. The list corresponds to the proteins identified using MASCOT database against Mycobacterium tuberculosis complex database with more than 95% confidence ( $p < 0.05$ ).

### Table S2:

Mycobacterial proteins identified from the LC-MALDI-MS/MS of the phagosome-enriched fractions from HIV-BCGinfected cells. The list corresponds to the proteins identified using MASCOT database against Mycobacterium tuberculosis complex database with more than 95% confidence ( $p < 0.05$ ).

### Table S3:

Primers used in the study.

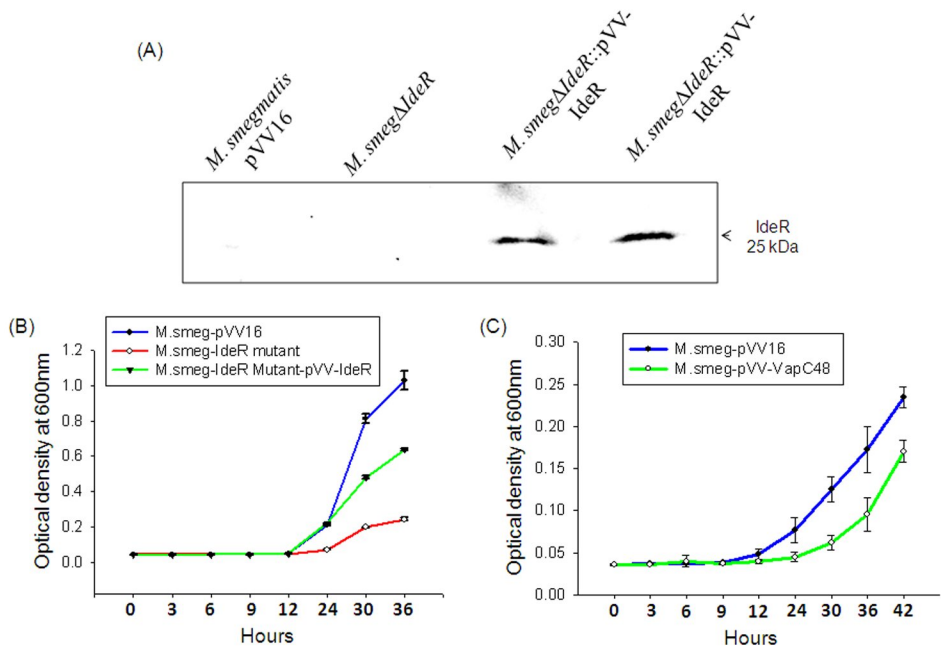

**Figure S1:** Western blot using anti-His antibody confirming the expression His-tagged IdeR in *M. smegmatis*. Lanes: Cell lysates of 1- Vector control *M. smegmatis*-pVV16; 2-*M. smegΔIdeR*; 3-protein marker; 4 and 5-*M. smegΔIdeR*-pVV-IdeR. (B) The growth curve of *M. smegΔIdeR* along with the corresponding vector control and mutant complemented strain. (C) The growth curve of *M. smeg*-pVV-VapC48 along with the corresponding vector control.



|                     |      |                                       |    |   | 91        | 18        | 45        |         |   |      |       |   |                                          |
|---------------------|------|---------------------------------------|----|---|-----------|-----------|-----------|---------|---|------|-------|---|------------------------------------------|
| BCG0937             | 2.9  | Uncharacterized protein Rv0885/MT0908 | 30 | 1 | 1032.5363 | 1031.5290 | 1031.5222 | 0.0068  | 0 | (5)  | 2.8   | 5 | R.QIEIGMWR.Q                             |
| BCG3477             | 14.1 | Antitoxin VapB47                      | 30 | 1 | 1198.6426 | 1197.6353 | 1197.7081 | -0.0727 | 0 | (3)  | 3.6   | 7 | R.ATVGLVEAIGIR.E                         |
| BCG3174             | 3.0  | NADH-quinone oxidoreductase subunit G | 25 | 2 | 1121.5306 | 1120.5233 | 1120.5183 | 0.0051  | 0 | 5    | 2.8   | 2 | -.MTQAADTDIR.V                           |
|                     |      |                                       |    |   | 1198.6378 | 1197.6305 | 1197.6539 | -0.0234 | 0 | (2)  | 4.9   | 6 | R.AAELMGIQIPR.F                          |
| BCG2301c ; BCG2302c | 5.0  | Hypothetical protein Rv2286c/MT2344   | 27 | 1 | 1121.5574 | 1120.5501 | 1120.5659 | -0.0157 | 1 | 27   | 0.012 | 1 | R.RTNMSLLDR.W + Oxidation (M)            |
| BCG1088             | 13.7 | Potassium-transporting ATPase B chain | 24 | 7 | 1091.5394 | 1090.5321 | 1090.5553 | -0.0232 | 1 | 4    | 2.7   | 3 | R.AESASAMLRR.N                           |
|                     |      |                                       |    |   | 1093.4906 | 1092.4833 | 1092.5637 | -0.0804 | 0 | 1    | 4     | 3 | R.SLFDPMIVR.S + Oxidation (M)            |
|                     |      |                                       |    |   | 1153.5696 | 1152.5623 | 1152.6073 | -0.0450 | 0 | (1)  | 5.4   | 2 | K.LNVMLHSPR.S + Oxidation (M)            |
|                     |      |                                       |    |   | 1233.6714 | 1232.6641 | 1232.6699 | -0.0058 | 1 | (13) | 0.41  | 1 | K.RSLFDPMIVR.S                           |
|                     |      |                                       |    |   | 1922.8695 | 1921.8622 | 1921.9349 | -0.0727 | 1 | 6    | 1.6   | 3 | M.MIARMETSATAAAATSAPR.L + Oxidation (M)  |
|                     |      |                                       |    |   | 1975.9419 | 1974.9346 | 1975.0309 | -0.0962 | 1 | 1    | 6.6   | 3 | K.QGQTFIDRMIALVEGAAR.Q                   |
|                     |      |                                       |    |   | 2049.9802 | 2048.9729 | 2048.9737 | -0.0008 | 1 | 0    | 7.9   | 6 | R.DEGVMSHARFVPFTAETR.M                   |
| BCG1539             | 20.3 | Peptidoglycan endopeptidase RipA      | 24 | 7 | 1233.6714 | 1232.6641 | 1232.6109 | 0.0532  | 1 | 2    | 5.6   | 8 | R.TERVNTESAAR.L                          |
|                     |      |                                       |    |   | 1578.7382 | 1577.7309 | 1577.7719 | -0.0409 | 0 | (3)  | 3.6   | 1 | K.TLSASSQAVMANLQR.A + 2 Deamidation (NQ) |

|          |      |                                            |    |   |               |               |               |         |   |      |        |   |                                                    |
|----------|------|--------------------------------------------|----|---|---------------|---------------|---------------|---------|---|------|--------|---|----------------------------------------------------|
|          |      |                                            |    |   | 2406.11<br>35 | 2405.10<br>62 | 2405.07<br>17 | 0.0345  | 1 | 0    | 5.9    | 3 | K.ANQRLQDLSDEVQAEQESV<br>NK.A + 5 Deamidation (NQ) |
|          |      |                                            |    |   | 847.549<br>0  | 846.541<br>7  | 846.419<br>5  | 0.1222  | 0 | 9    | 0.88   | 1 | R.VNTESAAR.L                                       |
|          |      |                                            |    |   | 1210.73<br>65 | 1209.72<br>92 | 1209.57<br>38 | 0.1555  | 0 | 1    | 5.1    | 6 | K.DANAAIAAAQHR.F + 2<br>Deamidation (NQ)           |
|          |      |                                            |    |   | 1605.79<br>55 | 1604.78<br>82 | 1604.68<br>01 | 0.1081  | 0 | 2    | 5.9    | 1 | R.DNAAAAEDDLEVSQR.A + 2<br>Deamidation (NQ)        |
|          |      |                                            |    |   | 1804.80<br>35 | 1803.79<br>62 | 1803.92<br>61 | -0.1298 | 1 | 6    | 1.9    | 1 | K.TLSASSQAVMANLQRAR.T<br>+ Deamidation (NQ)        |
| BCG3940c | 8.0  | ESX-2 secretion<br>system protein<br>EccE2 | 23 | 3 | 1091.53<br>28 | 1090.52<br>55 | 1090.58<br>83 | -0.0628 | 1 | (12) | 0.39   | 1 | K.LTGFSPRSAR.R                                     |
|          |      |                                            |    |   | 1132.48<br>44 | 1131.47<br>71 | 1131.55<br>20 | -0.0748 | 0 | (1)  | 1.9    | 2 | R.LGSDAVAGSAQR.W +<br>Deamidation (NQ)             |
|          |      |                                            |    |   | 1795.82<br>92 | 1794.82<br>19 | 1794.93<br>76 | -0.1157 | 1 | 4    | 2.9    | 1 | R.RPVKWNDPITLANNR.S + 2<br>Deamidation (NQ)        |
| BCG3756c | 11.0 | Probable<br>ribonuclease<br>VapC48         | 36 | 1 | 1521.81<br>58 | 1520.80<br>85 | 1520.81<br>33 | -0.0048 | 0 | 36   | 0.0019 | 1 | R.GNLVPDAHLVALMR.H +<br>Oxidation (M)              |
| BCG3226c | 7.2  | ATP-dependent<br>DNA helicase<br>pcaA      | 22 | 5 | 1048.58<br>04 | 1047.57<br>31 | 1047.61<br>89 | -0.0457 | 1 | 22   | 0.034  | 1 | R.RLAYVGITR.A                                      |
|          |      |                                            |    |   | 1247.65<br>97 | 1246.65<br>24 | 1246.70<br>33 | -0.0509 | 1 | 12   | 0.51   | 4 | K.EIRDIVAYLR.V                                     |
|          |      |                                            |    |   | 1497.72<br>27 | 1496.71<br>54 | 1496.73<br>33 | -0.0179 | 0 | (0)  | 4.9    | 5 | K.AIAGFVEMFDEL.R.G                                 |
|          |      |                                            |    |   | 1944.95<br>15 | 1943.94<br>42 | 1944.00<br>24 | -0.0582 | 1 | 1    | 5.5    | 9 | R.STQNILSAANSVIARNAGR.R<br>+ 2 Deamidation (NQ)    |
|          |      |                                            |    |   | 2060.01<br>39 | 2059.00<br>66 | 2058.98<br>57 | 0.0209  | 0 | 0    | 6.1    | 3 | R.LDNLNELVSVAHEFSTDR.E<br>+ Deamidation (NQ)       |
| BCG2654c | 27.8 | Uncharacterized<br>protein                 | 22 | 6 | 1627.93<br>98 | 1626.93<br>25 | 1626.89<br>94 | 0.0331  | 1 | 4    | 2.1    | 2 | R.FIYAGIADRLVHPR.E                                 |



|                     |      |                                       |    |   |               |               |               |         |   |     |       |   |                                                                       |
|---------------------|------|---------------------------------------|----|---|---------------|---------------|---------------|---------|---|-----|-------|---|-----------------------------------------------------------------------|
|                     |      | Rv2627c/MT270<br>2                    |    |   | 1654.87<br>54 | 1653.86<br>81 | 1653.79<br>98 | 0.0684  | 0 | 1   | 5.8   | 2 | R.ISQEVAAGLEFYGNR.R +<br>Deamidation (NQ)                             |
|                     |      |                                       |    |   | 1724.82<br>71 | 1723.81<br>98 | 1723.93<br>64 | -0.1166 | 0 | 12  | 0.6   | 1 | R.MISPLSLTLPVMPGR.F +<br>Oxidation (M)                                |
|                     |      |                                       |    |   | 1976.01<br>94 | 1975.01<br>21 | 1974.92<br>24 | 0.0898  | 0 | 0   | 7.7   | 4 | R.IFFDSGFTPHPGEPGSR.W                                                 |
|                     |      |                                       |    |   | 2101.05<br>47 | 2100.04<br>74 | 2100.09<br>63 | -0.0489 | 1 | 22  | 0.044 | 1 | R.FVQAALEQSGLLDAPRTQR.<br>D + Deamidation (NQ)                        |
|                     |      |                                       |    |   | 2369.14<br>89 | 2368.14<br>16 | 2368.25<br>79 | -0.1163 | 0 | 10  | 0.79  | 1 | R.WLEKPSGFFAQPPPLTEVAV<br>R.K                                         |
| Mb2002c             | 14.5 | Immunogenic<br>protein MPB64          | 22 | 2 | 1172.52<br>51 | 1171.51<br>78 | 1171.49<br>34 | 0.0244  | 0 | 22  | 0.022 | 1 | K.AFDWDQAYR.K +<br>Deamidation (NQ)                                   |
|                     |      |                                       |    |   | 2222.09<br>57 | 2221.08<br>84 | 2221.09<br>02 | -0.0018 | 0 | 1   | 6.3   | 4 | R.EAPYELNITSATYQSAIPPR.G<br>+ Deamidation (NQ)                        |
| BCG0489c            | 13.4 | Putative<br>membrane<br>protein mmpL4 | 25 | 7 | 1183.62<br>60 | 1182.61<br>87 | 1182.50<br>15 | 0.1172  | 0 | 25  | 0.033 | 1 | K.EAAYTMYR.G + Oxidation<br>(M)                                       |
|                     |      |                                       |    |   | 1356.72<br>97 | 1355.72<br>24 | 1355.77<br>72 | -0.0548 | 1 | 3   | 4.1   | 4 | K.QEIGAGLKTGIIR.S +<br>Deamidation (NQ)                               |
|                     |      |                                       |    |   | 1477.72<br>08 | 1476.71<br>35 | 1476.71<br>43 | -0.0008 | 1 | 1   | 7.6   | 4 | R.AMKSFSSDGHAAR.F                                                     |
|                     |      |                                       |    |   | 1909.97<br>84 | 1908.97<br>11 | 1908.88<br>08 | 0.0903  | 1 | 9   | 1     | 1 | R.MVGDTEEMKEITEELR.D                                                  |
|                     |      |                                       |    |   | 2214.03<br>69 | 2213.02<br>96 | 2213.07<br>46 | -0.0450 | 0 | (1) | 6.3   | 1 | R.TPTVPSETQPAGRPLAMSSD<br>R.L + Oxidation (M)                         |
|                     |      |                                       |    |   | 2377.22<br>14 | 2376.21<br>41 | 2376.08<br>33 | 0.1308  | 0 | 1   | 7.5   | 3 | R.LMPQMVAQIPPQIEAMEN<br>MR.T + 2 Deamidation (NQ);<br>3 Oxidation (M) |
|                     |      |                                       |    |   | 2433.15<br>80 | 2432.15<br>07 | 2432.09<br>61 | 0.0547  | 1 | 3   | 3.6   | 1 | K.AYVTGPSALAADMHHSRDR<br>SMAR.I + 2 Oxidation (M)                     |
| BCG2361;<br>BCG2362 | 5.5  | Putative<br>membrane<br>protein mmpL9 | 25 | 5 | 1147.69<br>31 | 1146.68<br>58 | 1146.62<br>44 | 0.0614  | 1 | 2   | 5.7   | 4 | R.EIKATTSELR.D                                                        |
|                     |      |                                       |    |   | 1183.62       | 1182.61       | 1182.50       | 0.1172  | 0 | 25  | 0.033 | 1 | R.EASFYTMYSR.G + Oxidation                                            |

|         |      |                                                      |    |   |               |               |               |         |   |     |       |   |                                                           |
|---------|------|------------------------------------------------------|----|---|---------------|---------------|---------------|---------|---|-----|-------|---|-----------------------------------------------------------|
|         |      |                                                      |    |   | 60            | 87            | 15            |         |   |     |       |   | (M)                                                       |
|         |      |                                                      |    |   | 1253.78<br>23 | 1252.77<br>50 | 1252.67<br>75 | 0.0975  | 0 | 3   | 2.4   | 4 | K.IVANSTPPEGIR.T                                          |
|         |      |                                                      |    |   | 1330.64<br>31 | 1329.63<br>58 | 1329.63<br>47 | 0.0012  | 0 | 4   | 4.1   | 2 | R.AVAVAPDDAQSMR.A                                         |
|         |      |                                                      |    |   | 1381.80<br>73 | 1380.80<br>00 | 1380.77<br>25 | 0.0276  | 1 | 3   | 4     | 5 | R.KIVANSTPPEGIR.T                                         |
| BCG2953 | 7.2  | Phenolphthiocerol synthesis polyketide synthase ppsA | 51 | 9 | 1104.54<br>13 | 1103.53<br>40 | 1103.60<br>08 | -0.0668 | 0 | 2   | 4.1   | 4 | R.ICTEITGLVR.T                                            |
|         |      |                                                      |    |   | 1105.54<br>86 | 1104.54<br>13 | 1104.54<br>11 | 0.0002  | 0 | (0) | 6.4   | 6 | M.TGSISGEADLR.H                                           |
|         |      |                                                      |    |   | 1187.64<br>05 | 1186.63<br>32 | 1186.64<br>92 | -0.0160 | 1 | 1   | 5.2   | 8 | R.IDAIRALEMR.G                                            |
|         |      |                                                      |    |   | 1254.66<br>70 | 1253.65<br>97 | 1253.68<br>40 | -0.0243 | 1 | 18  | 0.078 | 1 | R.RSSISQVPPQR.W                                           |
|         |      |                                                      |    |   | 1433.73<br>40 | 1432.72<br>67 | 1432.85<br>14 | -0.1246 | 1 | 2   | 3.6   | 4 | R.RDGVVLAPALAPVR.G                                        |
|         |      |                                                      |    |   | 1536.73<br>38 | 1535.72<br>65 | 1535.70<br>38 | 0.0227  | 0 | 10  | 0.75  | 1 | R.GFDQVGALSPTGQCR.A + Deamidation (NQ)                    |
|         |      |                                                      |    |   | 1558.68<br>77 | 1557.68<br>04 | 1557.79<br>33 | -0.1128 | 0 | 5   | 1.8   | 1 | R.VLAVICGSAVNQDGR.S + Carbamidomethyl (C)                 |
|         |      |                                                      |    |   | 1759.75<br>33 | 1758.74<br>60 | 1758.82<br>80 | -0.0819 | 0 | 2   | 3.4   | 2 | R.SNGLMAPNPAAQMAVLR.A + 3 Deamidation (NQ); Oxidation (M) |
|         |      |                                                      |    |   | 1819.80<br>75 | 1818.80<br>02 | 1818.78<br>17 | 0.0185  | 0 | (1) | 5.1   | 3 | R.QQGCHTMSLDWVAWR.G + 2 Deamidation (NQ)                  |
| BCG0389 | 14.6 | Chaperone protein dnaK (Heat shock protein 70)       | 38 | 5 | 989.549<br>9  | 988.542<br>6  | 988.526<br>3  | 0.0163  | 0 | 8   | 1     | 4 | R.MPAVTDLVK.E + Oxidation (M)                             |
|         |      |                                                      |    |   | 1567.77<br>76 | 1566.77<br>03 | 1566.87<br>69 | -0.1066 | 0 | 3   | 3.5   | 4 | K.LLGSFELTGIPPAPR.G                                       |
|         |      |                                                      |    |   | 1648.77<br>82 | 1647.77<br>09 | 1647.85<br>01 | -0.0792 | 1 | 7   | 1.1   | 1 | K.AALGGSDISAIKSAMEK.L                                     |

|          |      |                                        |    |   |               |               |               |         |   |     |       |    |                                                                                              |
|----------|------|----------------------------------------|----|---|---------------|---------------|---------------|---------|---|-----|-------|----|----------------------------------------------------------------------------------------------|
|          |      |                                        |    |   | 1655.76<br>09 | 1654.75<br>36 | 1654.90<br>02 | -0.1465 | 1 | 3   | 2.7   | 7  | R.QATKDAGQIAGLNVLR.I +<br>Deamidation (NQ)                                                   |
|          |      |                                        |    |   | 2774.27<br>34 | 2773.26<br>61 | 2773.22<br>02 | 0.0460  | 1 | 18  | 0.11  | 1  | K.RSETFTTADDNQPSVQIQVY<br>QGER.E + 5 Deamidation<br>(NQ)                                     |
| BCG1627  | 41.5 | Biotin synthase                        | 37 | 7 | 1037.44<br>17 | 1036.43<br>44 | 1036.50<br>11 | -0.0667 | 0 | 3   | 2.1   | 1  | R.WQTLSMVR.D +<br>Deamidation (NQ);<br>Oxidation (M)                                         |
|          |      |                                        |    |   | 1184.67<br>24 | 1183.66<br>51 | 1183.71<br>89 | -0.0538 | 1 | 21  | 0.053 | 1  | K.AVAAFRLALPR.T                                                                              |
|          |      |                                        |    |   | 1808.83<br>68 | 1807.82<br>95 | 1807.92<br>50 | -0.0955 | 1 | 3   | 2.9   | 2  | K.QTAKSGATEFCIVA AVR.G +<br>Carbamidomethyl (C)                                              |
|          |      |                                        |    |   | 2259.97<br>66 | 2258.96<br>93 | 2258.91<br>63 | 0.0531  | 0 | 0   | 5.8   | 3  | R.DAGMEVCCGGILGMGETL<br>QQR.A + Carboxymethyl (C);<br>2 Deamidation (NQ); 2<br>Oxidation (M) |
|          |      |                                        |    |   | 2749.23<br>36 | 2748.22<br>63 | 2748.28<br>33 | -0.0569 | 0 | (1) | 5.1   | 5  | R.NEVEINIACSLGMLTAEQVD<br>QLAAR.G +<br>Carbamidomethyl (C); 4<br>Deamidation (NQ)            |
|          |      |                                        |    |   | 2833.28<br>83 | 2832.28<br>10 | 2832.47<br>29 | -0.1919 | 1 | 0   | 5.6   | 10 | R.QQVLQRGEGLNQDQVLAVL<br>QLPDDR.L + Deamidation<br>(NQ)                                      |
|          |      |                                        |    |   | 3398.50<br>46 | 3397.49<br>73 | 3397.63<br>45 | -0.1371 | 1 | 9   | 0.62  | 2  | M.TQAATRPTNDAGQDGGN<br>NSDILVVARQQVLQR.G + 5<br>Deamidation (NQ)                             |
| BCG2943c | 9.0  | Chromosome<br>partition protein<br>smc | 34 | 7 | 929.473<br>6  | 928.466<br>3  | 928.497<br>8  | -0.0314 | 0 | 1   | 5.5   | 4  | R.AAAIQADLR.D +<br>Deamidation (NQ)                                                          |
|          |      |                                        |    |   | 1295.64<br>18 | 1294.63<br>45 | 1294.70<br>33 | -0.0688 | 1 | 5   | 2.1   | 5  | K.GFKSFAAPTTLR.F                                                                             |
|          |      |                                        |    |   | 1452.70<br>20 | 1451.69<br>47 | 1451.73<br>03 | -0.0355 | 0 | 7   | 0.87  | 9  | R.LHAAA VAAAVADCGR.L +<br>Carbamidomethyl (C)                                                |

|          |      |                                                 |    |   |               |               |               |         |   |     |      |    |                                                                       |
|----------|------|-------------------------------------------------|----|---|---------------|---------------|---------------|---------|---|-----|------|----|-----------------------------------------------------------------------|
|          |      |                                                 |    |   | 1616.79<br>47 | 1615.78<br>74 | 1615.79<br>14 | -0.0039 | 1 | 1   | 5.5  | 1  | R.AVDGASQLRDASAAQR.Q +<br>Deamidation (NQ)                            |
|          |      |                                                 |    |   | 1682.87<br>05 | 1681.86<br>32 | 1681.88<br>59 | -0.0227 | 1 | (2) | 3.7  | 8  | R.QAEAAQRAAAIQADLR.D                                                  |
|          |      |                                                 |    |   | 1773.81<br>96 | 1772.81<br>23 | 1772.91<br>56 | -0.1033 | 0 | 5   | 1.9  | 2  | R.TQTLDDVIQLETQLR.K +<br>Deamidation (NQ)                             |
|          |      |                                                 |    |   | 2581.10<br>60 | 2580.09<br>87 | 2580.28<br>53 | -0.1865 | 1 | 4   | 2.3  | 1  | R.EMHVIVGQGKLEEILQSRPE<br>DR.R + 2 Deamidation (NQ);<br>Oxidation (M) |
| BCG2457c | 14.3 | Glutamine-<br>dependent<br>NAD(+)<br>synthetase | 31 | 7 | 1225.60<br>96 | 1224.60<br>23 | 1224.55<br>57 | 0.0466  | 1 | 4   | 2.2  | 4  | R.LRMGTFDDNR.R +<br>Deamidation (NQ)                                  |
|          |      |                                                 |    |   | 1311.59<br>06 | 1310.58<br>33 | 1310.64<br>79 | -0.0646 | 1 | 2   | 2.6  | 2  | R.HHRELTESFR.R                                                        |
|          |      |                                                 |    |   | 1388.66<br>61 | 1387.65<br>88 | 1387.65<br>14 | 0.0075  | 1 | 6   | 1.8  | 6  | R.QMAPGDGERGTIR.I +<br>Deamidation (NQ)                               |
|          |      |                                                 |    |   | 1494.67<br>92 | 1493.67<br>19 | 1493.74<br>87 | -0.0768 | 1 | 10  | 0.59 | 1  | K.VSHGGALSPRGDWR.A                                                    |
|          |      |                                                 |    |   | 1612.77<br>44 | 1611.76<br>71 | 1611.77<br>80 | -0.0108 | 0 | 0   | 6.7  | 5  | K.VYDVTFENVQAGLR.T + 2<br>Deamidation (NQ)                            |
|          |      |                                                 |    |   | 1682.87<br>05 | 1681.86<br>32 | 1681.90<br>39 | -0.0406 | 0 | 1   | 5.2  | 10 | R.IDFALDPPAGDIGLLR.E                                                  |
|          |      |                                                 |    |   | 1744.79<br>37 | 1743.78<br>64 | 1743.93<br>79 | -0.1515 | 1 | 8   | 0.76 | 1  | R.SALPNGPKVSHGGALSPR.G                                                |
| BCG0716  | 12.0 | DNA-directed<br>RNA polymerase<br>beta chain    | 31 | 7 | 1335.67<br>55 | 1334.66<br>82 | 1334.66<br>19 | 0.0064  | 1 | 11  | 0.41 | 2  | R.GAWLEFDVDKR.D                                                       |
|          |      |                                                 |    |   | 1542.80<br>64 | 1541.79<br>91 | 1541.80<br>49 | -0.0058 | 1 | 1   | 6.1  | 2  | K.GETELTPEERLLR.A                                                     |
|          |      |                                                 |    |   | 1542.82<br>71 | 1541.81<br>98 | 1541.84<br>12 | -0.0214 | 1 | 5   | 2.3  | 1  | R.LRTVGELIQNQIR.V + 3<br>Deamidation (NQ)                             |
|          |      |                                                 |    |   | 1692.83<br>44 | 1691.82<br>71 | 1691.84<br>91 | -0.0220 | 1 | 5   | 2.1  | 1  | R.AGLEVRDVHPSHYGR.M                                                   |

|          |      |                           |    |   |               |               |               |         |   |     |      |    |                                                                              |
|----------|------|---------------------------|----|---|---------------|---------------|---------------|---------|---|-----|------|----|------------------------------------------------------------------------------|
|          |      |                           |    |   | 1755.81<br>64 | 1754.80<br>91 | 1754.92<br>83 | -0.1192 | 1 | 1   | 4.5  | 4  | R.ALMGANMQRQAVPLVR.S<br>+ Deamidation (NQ)                                   |
|          |      |                           |    |   | 2711.11<br>84 | 2710.11<br>11 | 2710.29<br>06 | -0.1795 | 1 | 3   | 2.8  | 4  | R.QSKTAASPSRQSSSNNS<br>VPGAPNR.V + 2<br>Deamidation (NQ)                     |
|          |      |                           |    |   | 3399.50<br>56 | 3398.49<br>83 | 3398.82<br>71 | -0.3288 | 1 | (4) | 1.7  | 8  | K.GVIGKILPVEDMPFLADGTP<br>VDIILNTHGVPR.R +<br>Oxidation (M)                  |
| BCG2112c | 11.7 | Probable<br>helicase helY | 29 | 6 | 1184.67<br>24 | 1183.66<br>51 | 1183.70<br>36 | -0.0385 | 1 | 17  | 0.14 | 2  | R.SVVGLVRGIER.G                                                              |
|          |      |                           |    |   | 1380.58<br>98 | 1379.58<br>25 | 1379.69<br>06 | -0.1080 | 1 | 4   | 2.2  | 3  | R.ADEQAHRITPSR.E                                                             |
|          |      |                           |    |   | 1448.71<br>89 | 1447.71<br>16 | 1447.75<br>06 | -0.0390 | 0 | 2   | 4.2  | 3  | R.GLAAHHAGMLPAFR.H                                                           |
|          |      |                           |    |   | 1701.84<br>50 | 1700.83<br>77 | 1700.86<br>68 | -0.0291 | 1 | (3) | 2.9  | 1  | R.WCRQVLDLLDQVR.N +<br>Carbamidomethyl (C);<br>Deamidation (NQ)              |
|          |      |                           |    |   | 1719.80<br>22 | 1718.79<br>49 | 1718.80<br>79 | -0.0130 | 1 | 1   | 4.5  | 10 | R.AGCDAAVTQCLRSPLR.L +<br>Carboxymethyl (C);<br>Deamidation (NQ)             |
|          |      |                           |    |   | 2996.32<br>06 | 2995.31<br>33 | 2995.47<br>82 | -0.1649 | 1 | 4   | 2.1  | 3  | K.LDAEGLLPITFVFSRAGCDA<br>AVTQCLR.S + Carboxymethyl<br>(C); Deamidation (NQ) |
| BCG1085c | 14.5 | Sensor protein<br>kdpD    | 28 | 7 | 1419.64<br>12 | 1418.63<br>39 | 1418.70<br>88 | -0.0749 | 1 | 6   | 1.6  | 1  | R.YAPDCVVRVNAGR.V                                                            |
|          |      |                           |    |   | 1567.77<br>76 | 1566.77<br>03 | 1566.88<br>03 | -0.1100 | 1 | 13  | 0.34 | 1  | K.TAKLLEGIEMIPPR.Y                                                           |
|          |      |                           |    |   | 1571.84<br>06 | 1570.83<br>33 | 1570.84<br>67 | -0.0133 | 1 | 1   | 4.4  | 5  | R.GARFPELDVEAVLR.R                                                           |
|          |      |                           |    |   | 1755.81<br>64 | 1754.80<br>91 | 1754.97<br>12 | -0.1621 | 1 | 5   | 1.8  | 1  | R.IASKSSAELMVVHVIR.G +<br>Oxidation (M)                                      |
|          |      |                           |    |   | 1762.89       | 1761.89       | 1761.97       | -0.0836 | 1 | 0   | 4.7  | 2  | R.ERVLINVIDEGPGVPR.G                                                         |

|          |      |                                              |    |   |           |           |           |         |   |    |      |   |                                                              |
|----------|------|----------------------------------------------|----|---|-----------|-----------|-----------|---------|---|----|------|---|--------------------------------------------------------------|
|          |      |                                              |    |   | 73        | 00        | 36        |         |   |    |      |   |                                                              |
|          |      |                                              |    |   | 1932.1108 | 1931.1035 | 1931.0475 | 0.0560  | 1 | 2  | 4.1  | 2 | R.RASQEAELLALFAGSVLR.G + Deamidation (NQ)                    |
|          |      |                                              |    |   | 2005.9008 | 2004.8935 | 2004.9469 | -0.0533 | 1 | 2  | 4    | 7 | R.VRQGASTGETVACVGTNPC R.D                                    |
| BCG0717  | 5.1  | DNA-directed RNA polymerase beta' chain      | 27 | 4 | 944.4952  | 943.4879  | 943.5450  | -0.0571 | 1 | 15 | 0.23 | 3 | R.KGLADTALR.T                                                |
|          |      |                                              |    |   | 1314.6951 | 1313.6878 | 1313.6826 | 0.0052  | 0 | 6  | 1.4  | 3 | K.VQAAIINDLAER.Y + 2 Deamidation (NQ)                        |
|          |      |                                              |    |   | 1819.8251 | 1818.8178 | 1818.9264 | -0.1086 | 0 | 1  | 4.9  | 4 | R.EGLTVLEYFINTHGAR.K                                         |
|          |      |                                              |    |   | 2355.0615 | 2354.0542 | 2354.2449 | -0.1907 | 0 | 5  | 1.9  | 4 | R.ILMSSNNILSPASGRPLAMP R.L + Deamidation (NQ); Oxidation (M) |
| BCG3215c | 6.0  | Hypothetical UPF0182 protein Mb3215c         | 26 | 4 | 1349.6907 | 1348.6834 | 1348.6734 | 0.0100  | 1 | 12 | 0.34 | 1 | R.NGNLRDYVVAAR.E + 2 Deamidation (NQ)                        |
|          |      |                                              |    |   | 1384.6375 | 1383.6302 | 1383.6782 | -0.0480 | 1 | 13 | 0.32 | 1 | K.KGDFAAAYGSALQR.L + Deamidation (NQ)                        |
|          |      |                                              |    |   | 1481.8254 | 1480.8181 | 1480.8361 | -0.0180 | 0 | 0  | 5.1  | 5 | K.VAALQEIQAAIGAAR.D                                          |
|          |      |                                              |    |   | 1483.6919 | 1482.6846 | 1482.7426 | -0.0580 | 1 | 2  | 3.6  | 1 | R.ELNPDRIDLINQR.D + Deamidation (NQ)                         |
| BCG1357  | 11.0 | Transcription termination factor rho homolog | 25 | 5 | 1305.5776 | 1304.5703 | 1304.6095 | -0.0392 | 0 | 13 | 0.27 | 1 | R.LDSINGGSVEDAK.K + Deamidation (NQ)                         |
|          |      |                                              |    |   | 1431.6693 | 1430.6620 | 1430.7616 | -0.0996 | 0 | 6  | 1.5  | 3 | K.TTILQDIANAIR.N + 2 Deamidation (NQ)                        |
|          |      |                                              |    |   | 1515.7021 | 1514.6948 | 1514.7841 | -0.0892 | 1 | 4  | 3.1  | 4 | R.RVFPVDVNPSTGR.K + Deamidation (NQ)                         |
|          |      |                                              |    |   | 1685.8181 | 1684.8108 | 1684.9471 | -0.1363 | 1 | 1  | 5.5  | 5 | K.AGKTILQDIANAIR.N                                           |
|          |      |                                              |    |   | 1815.9473 | 1814.9400 | 1814.9791 | -0.0391 | 1 | 2  | 4.5  | 2 | K.RPEFGKLTPLYPNQR.L                                          |

|          |      |                                                                       |    |   |           |           |           |         |   |    |       |   |                                                            |
|----------|------|-----------------------------------------------------------------------|----|---|-----------|-----------|-----------|---------|---|----|-------|---|------------------------------------------------------------|
| BCG1194c | 7.2  | 5-methyltetrahydropteroyltriglutamate--homocysteine methyltransferase | 25 | 4 | 1121.5673 | 1120.5600 | 1120.5625 | -0.0025 | 1 | 7  | 1.1   | 1 | R.RADQAEYLR.W                                              |
|          |      |                                                                       |    |   | 1431.6693 | 1430.6620 | 1430.7630 | -0.1010 | 1 | 3  | 2.5   | 6 | R.RQPFTATITGSPR.I                                          |
|          |      |                                                                       |    |   | 1433.7340 | 1432.7267 | 1432.7674 | -0.0406 | 0 | 12 | 0.38  | 1 | R.LGLDVLVHGEPER.N                                          |
|          |      |                                                                       |    |   | 1460.6379 | 1459.6306 | 1459.7129 | -0.0823 | 1 | 3  | 2.7   | 6 | R.LWVNPDCGLKTR.N + Carboxymethyl (C); Deamidation (NQ)     |
| BCG0453c | 22.1 | Probable thiamine-phosphate pyrophosphorylase                         | 25 | 3 | 958.5460  | 957.5387  | 957.4879  | 0.0508  | 1 | 6  | 1.8   | 2 | R.DKGSPGELR.F                                              |
|          |      |                                                                       |    |   | 1452.7020 | 1451.6947 | 1451.7554 | -0.0607 | 1 | 13 | 0.24  | 2 | R.LASARLYLCTDAR.R                                          |
|          |      |                                                                       |    |   | 2130.0793 | 2129.0720 | 2129.1003 | -0.0283 | 0 | 7  | 1     | 2 | R.GDLAQFAEALAGGVDDIIQL R.D + 2 Deamidation (NQ)            |
| BCG2367c | 20.0 | Deoxyguanosine triphosphate triphosphohydrolase-like protein          | 24 | 4 | 1184.6724 | 1183.6651 | 1183.6560 | 0.0091  | 1 | 14 | 0.28  | 4 | R.LADKTQVVGPR.E + Deamidation (NQ)                         |
|          |      |                                                                       |    |   | 1513.7422 | 1512.7349 | 1512.8259 | -0.0910 | 0 | 0  | 6     | 4 | K.VVDAQGLSAGLNLTR.A                                        |
|          |      |                                                                       |    |   | 2130.0793 | 2129.0720 | 2129.1918 | -0.1197 | 1 | 8  | 0.76  | 1 | R.AEVAVLKILALQFIMSDPR.H + Oxidation (M)                    |
|          |      |                                                                       |    |   | 3398.5046 | 3397.4973 | 3397.6182 | -0.1209 | 0 | 2  | 2.7   | 7 | R.GMAIGLGCDLDELVELAGLA HDIGHPPYGHNGER.A + Deamidation (NQ) |
| BCG1182  | 8.4  | Probable glucose-6-phosphate 1-dehydrogenase                          | 24 | 3 | 985.4664  | 984.4591  | 984.4698  | -0.0107 | 0 | 4  | 1.7   | 3 | R.AMAPLDPDR.C                                              |
|          |      |                                                                       |    |   | 1254.6670 | 1253.6597 | 1253.7244 | -0.0647 | 1 | 18 | 0.078 | 1 | R.RVPALAFLPNR.R + Deamidation (NQ)                         |
|          |      |                                                                       |    |   | 1372.6959 | 1371.6886 | 1371.6782 | 0.0104  | 0 | 2  | 4.6   | 6 | R.GSWGPEAAQSLLR.G + Deamidation (NQ)                       |
| Mb2007c  | 17.2 | Putative HTH-type                                                     | 24 | 3 | 1452.7020 | 1451.6947 | 1451.7481 | -0.0533 | 1 | 13 | 0.23  | 1 | R.IEDQDHSARLLR.E                                           |

|          |      |                                                          |    |   |           |           |           |         |   |     |      |   |                                                                                |
|----------|------|----------------------------------------------------------|----|---|-----------|-----------|-----------|---------|---|-----|------|---|--------------------------------------------------------------------------------|
|          |      | transcriptional regulator Mb2007c                        |    |   | 1682.8705 | 1681.8632 | 1681.9297 | -0.0665 | 1 | 9   | 0.72 | 2 | R.EKPCRATTAGIPLLR.L + Carbamidomethyl (C)                                      |
|          |      |                                                          |    |   | 2017.9869 | 2016.9796 | 2016.9356 | 0.0440  | 1 | 4   | 2.5  | 1 | R.EGVAMGAVTTERNPVPGCR.V + Carbamidomethyl (C); Deamidation (NQ); Oxidation (M) |
| BCG1573  | 11.1 | Putative fatty-acid--CoA ligase fadD25                   | 24 | 4 | 1138.5665 | 1137.5592 | 1137.5600 | -0.0008 | 1 | 14  | 0.17 | 1 | R.RAQCVELYR.Q + Deamidation (NQ)                                               |
|          |      |                                                          |    |   | 1389.6616 | 1388.6543 | 1388.7333 | -0.0790 | 0 | 4   | 2.8  | 1 | -.MSVVESSLPGVLR.E + Oxidation (M)                                              |
|          |      |                                                          |    |   | 2056.9133 | 2055.9060 | 2056.0298 | -0.1238 | 1 | 3   | 3.7  | 1 | R.TGDSGFLSEGELFIMGRIK.D                                                        |
|          |      |                                                          |    |   | 2126.0117 | 2125.0044 | 2125.0228 | -0.0184 | 1 | (1) | 5.6  | 3 | R.SWDGVEETLTWSQLYRR.T                                                          |
| BCG0932  | 49.7 | Putative HTH-type transcriptional regulator Mb0904       | 23 | 4 | 943.5424  | 942.5351  | 942.5069  | 0.0282  | 0 | 10  | 0.69 | 2 | R.VRPPSMTR.V                                                                   |
|          |      |                                                          |    |   | 1175.5951 | 1174.5878 | 1174.6380 | -0.0501 | 0 | 3   | 3.1  | 2 | R.LASDLSLAVMR.L                                                                |
|          |      |                                                          |    |   | 1600.7428 | 1599.7355 | 1599.8369 | -0.1013 | 1 | 5   | 1.7  | 1 | R.QEWLAERLATLNR.S + Deamidation (NQ)                                           |
|          |      |                                                          |    |   | 3084.3748 | 3083.3675 | 3083.5808 | -0.2133 | 0 | 5   | 1.4  | 4 | R.NPSSPVLSQLSALTTLANEGAMTPGALAIR.E + Deamidation (NQ); Oxidation (M)           |
| BCG1389c | 3.3  | Alpha-1,4-glucan:maltose-1-phosphate maltosyltransferase | 29 | 2 | 1570.8674 |           | 1570.9427 | -0.0753 | 0 | 15  |      | 1 | SLQPFITRLNIIR                                                                  |
|          |      |                                                          |    |   | 2024.0833 |           | 2024.0083 | 0.075   | 0 | 15  |      | 1 | DFASALDQGRSLQPFITR + Deamidation (NQ)                                          |
| BCG2562c | 9.2  | Chorismate synthase                                      | 30 | 2 | 1712.9463 |           | 1712.886  | 0.0603  | 0 | 17  |      | 1 | AGGLEGGMTNGQPLRVR                                                              |
|          |      |                                                          |    |   | 2172.1531 |           | 2172.0278 | 0.1253  | 0 | 13  |      | 1 | WETVMAADPVDPAELADVAR + Oxidation (M)                                           |



|         |      |                                           |    |   |         |  |         |         |   |    |  |   |                                                                   |  |  |
|---------|------|-------------------------------------------|----|---|---------|--|---------|---------|---|----|--|---|-------------------------------------------------------------------|--|--|
| BCG1550 | 10.0 | Uncharacterized protein Mb1524            | 40 | 3 | 958.460 |  | 958.495 | -0.035  | 0 | 15 |  | 1 | DQINAQLR + Deamidation (NQ)                                       |  |  |
|         |      |                                           |    |   | 2       |  | 2       |         |   |    |  |   |                                                                   |  |  |
|         |      |                                           |    |   | 1574.83 |  | 1574.85 | -0.0242 |   | 13 |  | 5 | AMILTAEGTREAAIK                                                   |  |  |
|         |      |                                           |    |   |         |  |         |         |   |    |  |   |                                                                   |  |  |
|         |      |                                           |    |   | 2561.17 |  | 2561.29 | -0.1272 | 0 | 13 |  | 1 | NVVGGMTLEQTLTSRDQINA<br>QLR + Deamidation (NQ) +<br>Oxidation (M) |  |  |
|         |      |                                           |    |   | 16      |  | 88      |         |   |    |  |   |                                                                   |  |  |
| BCG0788 | 12.1 | Uncharacterized protein Rv0738/MT076<br>3 | 32 | 2 | 1361.67 |  | 1361.70 | -0.0321 | 0 | 12 |  | 1 | AQDAFAALLANVR +<br>Deamidation (NQ)                               |  |  |
|         |      |                                           |    |   | 38      |  | 59      |         |   |    |  |   |                                                                   |  |  |
|         |      |                                           |    |   | 2441.10 |  | 2441.20 | -0.1047 | 0 | 20 |  | 1 | MDPLMAHQRAQDAFAALLA<br>NVR + Deamidation (NQ)                     |  |  |
|         |      |                                           |    |   | 16      |  | 63      |         |   |    |  |   |                                                                   |  |  |
| BCG0946 | 9.7  | Uncharacterized protein Mb0918            | 32 | 2 | 2126.01 |  | 2126.16 | -0.1465 | 0 | 13 |  | 1 | VPPLSLTNDAIELFVDRAR                                               |  |  |
|         |      |                                           |    |   | 39      |  | 04      |         |   |    |  |   |                                                                   |  |  |
|         |      |                                           |    |   | 2131.00 |  | 2131.14 | -0.1382 | 0 | 19 |  | 1 | SRLALQIGAQIAHEFTYGR                                               |  |  |
|         |      |                                           |    |   | 24      |  | 06      |         |   |    |  |   |                                                                   |  |  |

**Table S2:** Mycobacterial proteins identified from the LC-MALDI-MS/MS of the phagosome-enriched fractions from HIV-BCG infected cells. The list corresponds to the proteins identified using MASCOT database against Mycobacterium tuberculosis complex database with more than 95% confidence (p<0.05).

| Accession | % Sequence coverage | Protein name               | score   | Number of Peptides matched | Observed | Mr(expt) | Mr(calc) | Delta                                 | Miss | Score | Expect | Rank | Peptide                                                   |  |  |
|-----------|---------------------|----------------------------|---------|----------------------------|----------|----------|----------|---------------------------------------|------|-------|--------|------|-----------------------------------------------------------|--|--|
| BCG1368   | 24.6                | ATP synthase subunit alpha | 200     | 9                          | 1044.596 | 1043.589 | 1043.543 | 0.0457                                | 0    | 2     | 6.2    | 4    | K.AIDAMTPIGR.G                                            |  |  |
|           |                     |                            |         |                            | 3        | 0        | 3        |                                       |      |       |        |      |                                                           |  |  |
|           |                     |                            |         |                            | 1289.562 | 1288.555 | 1288.651 | -0.0959                               | 0    | 3     | 2      | 6    | R.ASEEEILTEIR.D                                           |  |  |
|           |                     |                            |         |                            | 4        | 1        | 0        |                                       |      |       |        |      |                                                           |  |  |
|           |                     |                            |         |                            | 1927.958 | 1926.951 | 1927.008 | -0.0574                               | 1    | (0)   | 6.8    | 7    | K.EPLQTGIK AIDAMTPIGR.G + Deamidation (NQ); Oxidation (M) |  |  |
|           |                     |                            |         |                            | 3        | 0        | 4        |                                       |      |       |        |      |                                                           |  |  |
|           |                     |                            |         |                            | 901.5200 | 900.5127 | 900.4777 | 0.0350                                | 1    | 5     | 2.4    | 3    | K.AQLERGAR.L + Deamidation (NQ)                           |  |  |
|           |                     |                            |         |                            | 3575.642 | 3574.634 | 3574.761 | -0.1264                               | 0    | 0     | 4.1    | 1    | K.QPQSQPMPVEEQVVSIFLGTGGHL DSVPVEDVR.R + Deamidation (NQ) |  |  |
|           |                     |                            |         |                            | 1        | 8        | 2        |                                       |      |       |        |      |                                                           |  |  |
| 1306.600  | 1305.593            | 1305.602                   | -0.0090 | 0                          | 1        | 5.9      | 5        | R.FETELLDHMR.A + Oxidation (M)        |      |       |        |      |                                                           |  |  |
| 6         | 3                   | 3                          |         |                            |          |          |          |                                       |      |       |        |      |                                                           |  |  |
| 1334.705  | 1333.697            | 1333.636                   | 0.0616  | 1                          | 0        | 6.7      | 4        | R.DSQKLTEEAADK.L                      |      |       |        |      |                                                           |  |  |
| 0         | 7                   | 1                          |         |                            |          |          |          |                                       |      |       |        |      |                                                           |  |  |
| 1553.695  | 1552.688            | 1552.731                   | -0.0425 | 0                          | 91       | 5e-009   | 1        | R.EAYPGDVFYLHSR.L                     |      |       |        |      |                                                           |  |  |
| 8         | 5                   | 0                          |         |                            |          |          |          |                                       |      |       |        |      |                                                           |  |  |
| 1607.773  | 1606.765            | 1606.831                   | -0.0656 | 1                          | 6        | 1.9      | 1        | K.EVAGSLRLDLSQYR.E + Deamidation (NQ) |      |       |        |      |                                                           |  |  |
| 1         | 8                   | 4                          |         |                            |          |          |          |                                       |      |       |        |      |                                                           |  |  |

|                       |          |                                         |         |   |          |          |          |                                                   |   |      |       |   |                                                         |  |  |
|-----------------------|----------|-----------------------------------------|---------|---|----------|----------|----------|---------------------------------------------------|---|------|-------|---|---------------------------------------------------------|--|--|
| BCG1370               | 23.7     | ATP synthase subunit beta               | 88      | 6 | 1325.715 | 1324.707 | 1324.782 | -0.0747                                           | 1 | (1)  | 3.9   | 3 | R.VAQEVIRILQR.Y + Deamidation (NQ)                      |  |  |
|                       |          |                                         |         |   | 2        | 9        | 6        |                                                   |   |      |       |   |                                                         |  |  |
|                       |          |                                         |         |   | 1779.024 | 1778.017 | 1777.968 | 0.0488                                            | 0 | 0    | 2.4   | 1 | K.TLTLEVAQHLGDNLVR.T                                    |  |  |
|                       |          |                                         |         |   | 7        | 4        | 6        |                                                   |   |      |       |   |                                                         |  |  |
|                       |          |                                         |         |   | 1800.817 | 1799.809 | 1799.894 | -0.0842                                           | 0 | (3)  | 3.1   | 7 | R.EGNDLWVELAEANVLK.D + Deamidation (NQ)                 |  |  |
|                       |          |                                         |         |   | 1        | 8        | 1        |                                                   |   |      |       |   |                                                         |  |  |
| 1921.896              | 1920.889 | 1920.958                                | -0.0689 | 0 | (46)     | 0.000    | 1        | R.DEQQQDVLLFIDNIFR.F                              |   |      |       |   |                                                         |  |  |
| 5                     | 2        | 1                                       |         |   | )        | 16       |          |                                                   |   |      |       |   |                                                         |  |  |
| 1998.023              | 1997.016 | 1997.079                                | -0.0628 | 1 | 1        | 7.2      | 1        | R.GVEVIDTGRSISVPVGEGVK.G                          |   |      |       |   |                                                         |  |  |
| 7                     | 4        | 2                                       |         |   |          |          |          |                                                   |   |      |       |   |                                                         |  |  |
| 2741.274              | 2740.266 | 2740.401                                | -0.1348 | 1 | (2)      | 4.4      | 7        | K.DLQDIIAILGIDELSEEDKQLVNR.A + 2 Deamidation (NQ) |   |      |       |   |                                                         |  |  |
| 2                     | 9        | 7                                       |         |   |          |          |          |                                                   |   |      |       |   |                                                         |  |  |
| BCG1539               | 12.7     | Peptidoglycan endopeptidase RipA        | 34      | 3 | 1233.684 | 1232.676 | 1232.610 | 0.0660                                            | 1 | 4    | 2.8   | 8 | R.TERVNTESAAR.L                                         |  |  |
|                       |          |                                         |         |   | 2        | 9        | 9        |                                                   |   |      |       |   |                                                         |  |  |
|                       |          |                                         |         |   | 1594.856 | 1593.848 | 1593.766 | 0.0819                                            | 0 | (26) | 0.022 | 1 | K.TLSASSQAVMANLQR.A + 2 Deamidation (NQ); Oxidation (M) |  |  |
| 0                     | 7        | 8                                       |         |   | )        |          |          |                                                   |   |      |       |   |                                                         |  |  |
| 2827.288              | 2826.281 | 2826.329                                | -0.0485 | 1 | 3        | 2.9      | 1        | R.LVAWSSEGGQGAPPFRMWDPGS GPAGGR.A                 |   |      |       |   |                                                         |  |  |
| 3                     | 0        | 5                                       |         |   |          |          | 0        |                                                   |   |      |       |   |                                                         |  |  |
| BCG2301c;<br>BCG2302c | 5.0      | Uncharacterized protein Rv2286c/M T2344 | 31      | 1 | 1121.546 | 1120.539 | 1120.565 | -0.0268                                           | 1 | (21) | 0.059 | 1 | R.RTNMSLLDR.W + Oxidation (M)                           |  |  |
|                       |          |                                         |         |   | 3        | 0        | 9        |                                                   |   | )    |       |   |                                                         |  |  |
| BCG0717               | 6.0      | DNA-directed                            | 29      | 6 | 842.4922 | 841.4849 | 841.4657 | 0.0192                                            | 0 | 1    | 6.5   | 4 | R.APDGTLIR.D                                            |  |  |

|         |      |                                          |    |   |          |          |          |         |   |      |       |   |                                                                |
|---------|------|------------------------------------------|----|---|----------|----------|----------|---------|---|------|-------|---|----------------------------------------------------------------|
|         |      | RNA polymerase subunit beta'             |    |   | 944.4871 | 943.4798 | 943.5450 | -0.0652 | 1 | (16) | 0.3   | 2 | R.KGLADTALR.T                                                  |
|         |      |                                          |    |   | 1314.714 | 1313.707 | 1313.682 | 0.0246  | 0 | (20) | 0.066 | 1 | K.VQAAIINDLAER.Y + 2 Deamidation (NQ)                          |
|         |      |                                          |    |   | 5        | 2        | 6        |         |   | )    |       |   |                                                                |
|         |      |                                          |    |   | 1331.679 | 1330.672 | 1330.735 | -0.0633 | 1 | 0    | 8     | 4 | K.LIPAGTGINRYR.N + Deamidation (NQ)                            |
|         |      |                                          |    |   | 6        | 3        | 7        |         |   |      |       |   |                                                                |
|         |      |                                          |    |   | 1409.760 | 1408.753 | 1408.797 | -0.0442 | 1 | (0)  | 5.7   | 6 | K.HIEVIVRQMLR.R + Oxidation (M)                                |
|         |      |                                          |    |   | 3        | 0        | 2        |         |   |      |       |   |                                                                |
|         |      |                                          |    |   | 1750.949 | 1749.941 | 1749.846 | 0.0950  | 1 | (2)  | 4.4   | 4 | K.RMLQESVDALFDNGR.R                                            |
|         |      |                                          |    |   | 0        | 7        | 8        |         |   |      |       |   |                                                                |
| BCG1550 | 13.4 | Uncharacterized protein Rv1488/MT 1533.2 | 27 | 3 | 958.4566 | 957.4493 | 957.4879 | -0.0386 | 0 | (9)  | 0.86  | 1 | R.DQINAQLR.G + Deamidation (NQ)                                |
|         |      |                                          |    |   | 1574.830 | 1573.823 | 1573.849 | -0.0262 | 1 | (17) | 0.14  | 2 | R.AMILTAEGTREAAIK.Q                                            |
|         |      |                                          |    |   | 8        | 5        | 7        |         |   | )    |       |   |                                                                |
|         |      |                                          |    |   | 2569.215 | 2568.208 | 2568.235 | -0.0267 | 0 | 1    | 5.3   | 1 | K.AGRPTPEMLAYQYLQTLPEMAR.G + Deamidation (NQ); 2 Oxidation (M) |
|         |      |                                          |    |   | 8        | 5        | 2        |         |   |      |       |   |                                                                |
| BCG0123 | 14.5 | Uncharacterized protein Rv0090/MT 0099   | 24 | 2 | 944.4871 | 943.4798 | 943.5087 | -0.0288 | 0 | (15) | 0.34  | 3 | R.GAIQATLDR.D                                                  |
|         |      |                                          |    |   | 2557.248 | 2556.240 | 2556.243 | -0.0023 | 0 | 3    | 2.9   | 3 | R.WELITCGLGGHVITYAPDDAALAAAR.L                                 |
|         |      |                                          |    |   | 0        | 7        | 0        |         |   |      |       |   |                                                                |
| BCG1689 | 4.0  | Phenylalanine--tRNA ligase beta subunit  | 23 | 2 | 1361.691 | 1360.683 | 1360.746 | -0.0625 | 0 | 6    | 2.1   | 5 | R.QPQHVA AVL AGLR.E + 2 Deamidation (NQ)                       |
|         |      |                                          |    |   | 0        | 7        | 2        |         |   |      |       |   |                                                                |
|         |      |                                          |    |   | 1799.824 | 1798.817 | 1798.888 | -0.0708 | 0 | 23   | 0.03  | 1 | R.RPTDDEIAMLDASLPR.Q                                           |
|         |      |                                          |    |   | 8        | 5        | 3        |         |   |      |       |   |                                                                |

|          |      |                                                      |    |    |          |          |          |         |   |      |       |   |                                                      |  |
|----------|------|------------------------------------------------------|----|----|----------|----------|----------|---------|---|------|-------|---|------------------------------------------------------|--|
| BCG3932  | 20.4 | ESX-1 secretion system protein eccB1                 | 22 | 4  | 1361.691 | 1360.683 | 1360.761 | -0.0778 | 1 | 22   | 0.044 | 1 | K.VQVSGWRFLLR.R + Deamidation (NQ)                   |  |
|          |      |                                                      |    |    | 0        | 7        | 5        |         |   |      |       |   |                                                      |  |
|          |      |                                                      |    |    | 2834.276 | 2833.269 | 2833.326 | -0.0572 | 1 | 0    | 4.6   | 8 | K.FVALQSPDPRYTESMYIDPQGVR.Y + 2 Deamidation (NQ)     |  |
|          |      |                                                      |    |    | 9        | 6        | 8        |         |   |      |       |   |                                                      |  |
|          |      |                                                      |    |    | 2839.356 | 2838.349 | 2838.512 | -0.1632 | 1 | 2    | 5.5   | 2 | R.LLVDPVLSKDAALLEHDTLPADPS PR.K                      |  |
|          |      |                                                      |    |    | 7        | 4        | 7        |         |   |      |       |   |                                                      |  |
|          |      |                                                      |    |    | 2937.317 | 2936.310 | 2936.488 | -0.1781 | 1 | 0    | 4.9   | 1 | R.HLPISPSAMNMGIKQIHGTATVYLD GGK.F + Deamidation (NQ) |  |
|          |      |                                                      |    |    | 9        | 6        | 7        |         |   |      |       |   |                                                      |  |
| BCG3331c | 5.6  | Glycerol-3-phosphate dehydrogenase 2                 | 22 | 2  | 958.5484 | 957.5411 | 957.5719 | -0.0308 | 1 | 22   | 0.048 | 1 | K.RSSLIGGIR.Y                                        |  |
|          |      |                                                      |    |    | 2172.166 | 2171.159 | 2171.163 | -0.0040 | 1 | 1    | 4.8   | 2 | R.TAAHYGAVVRCSTQVVALLR.E                             |  |
|          |      |                                                      |    |    | 5        | 2        | 3        |         |   |      |       |   |                                                      |  |
| BCG0626  | 15.5 | Antitoxin VapB26                                     | 22 | 1  | 958.4647 | 957.4574 | 957.5243 | -0.0669 | 0 | (13) | 0.38  | 1 | R.GVSEAQVIR.E                                        |  |
|          |      |                                                      |    |    |          |          |          |         |   | )    |       |   |                                                      |  |
| BCG2953  | 12.9 | Phenolphthiocerol synthesis polyketide synthase ppsA | 35 | 14 | 860.5117 | 859.5044 | 859.4512 | 0.0533  | 1 | 5    | 2.3   | 2 | K.RLTDAQR.D + Deamidation (NQ)                       |  |
|          |      |                                                      |    |    | 1105.563 | 1104.555 | 1104.541 | 0.0147  | 0 | 1    | 7.1   | 2 | M.TGSISGEADLR.H                                      |  |
|          |      |                                                      |    |    | 1        | 8        | 1        |         |   |      |       |   |                                                      |  |
|          |      |                                                      |    |    | 1254.657 | 1253.649 | 1253.684 | -0.0341 | 1 | 5    | 2     | 4 | R.RSSISQVPPQR.W                                      |  |
|          |      |                                                      |    |    | 2        | 9        | 0        |         |   |      |       |   |                                                      |  |
|          |      |                                                      |    |    | 1409.760 | 1408.753 | 1408.721 | 0.0319  | 0 | (1)  | 5.1   | 5 | R.LAPDAKPYQGGHR.F                                    |  |
|          |      |                                                      |    |    | 3        | 0        | 1        |         |   |      |       |   |                                                      |  |
|          |      |                                                      |    |    | 1743.758 | 1742.751 | 1742.833 | -0.0818 | 0 | (18) | 0.065 | 1 | R.SNGLMAPNPAAQMAVLR.A + 3 Deamidation (NQ)           |  |
|          |      |                                                      |    |    | 5        | 2        | 1        |         |   | )    |       |   |                                                      |  |
|          |      |                                                      |    |    | 2348.076 | 2347.069 | 2347.078 | -0.0092 | 0 | 0    | 5     | 2 | R.HVTAQLSSSPSDSASSLNEHHR.A + Deamidation (NQ)        |  |
|          |      |                                                      |    |    | 9        | 6        | 8        |         |   |      |       |   |                                                      |  |

|              |      |                                                  |    |    |               |               |               |         |   |          |       |   |                                                          |
|--------------|------|--------------------------------------------------|----|----|---------------|---------------|---------------|---------|---|----------|-------|---|----------------------------------------------------------|
|              |      |                                                  |    |    | 2619.272<br>9 | 2618.265<br>6 | 2618.330<br>8 | -0.0652 | 1 | 8        | 1.3   | 1 | K.ELDTDRPF AELGLNSLMAMAIRR.E                             |
|              |      |                                                  |    |    | 1104.617<br>3 | 1103.610<br>0 | 1103.600<br>8 | 0.0092  | 0 | 12       | 0.41  | 1 | R.ICTEITGLVR.T                                           |
|              |      |                                                  |    |    | 1187.679<br>7 | 1186.672<br>4 | 1186.649<br>2 | 0.0232  | 1 | 8        | 1.1   | 3 | R.IDAIRALEMR.G                                           |
|              |      |                                                  |    |    | 1536.826<br>8 | 1535.819<br>5 | 1535.703<br>8 | 0.1157  | 0 | 10       | 0.65  | 1 | R.GFDQVGALSPTGQCR.A +<br>Deamidation (NQ)                |
|              |      |                                                  |    |    | 1558.715<br>2 | 1557.707<br>9 | 1557.793<br>3 | -0.0853 | 0 | 2        | 4.2   | 1 | R.VLAVICGSAVNQDGR.S +<br>Carbamidomethyl (C)             |
|              |      |                                                  |    |    | 1661.840<br>1 | 1660.832<br>8 | 1660.805<br>6 | 0.0272  | 1 | 1        | 5.1   | 3 | R.RDWQLDTLDELTR.R +<br>Deamidation (NQ)                  |
|              |      |                                                  |    |    | 1819.885<br>1 | 1818.877<br>8 | 1818.781<br>7 | 0.0961  | 0 | 3        | 3.3   | 1 | R.QQGCHTMLDWWAWR.G + 2<br>Deamidation (NQ)               |
|              |      |                                                  |    |    | 3329.467<br>0 | 3328.459<br>7 | 3328.571<br>6 | -0.1119 | 0 | 1        | 4.2   | 2 | R.VSATAGMLADWMEGPGADVALAD<br>VAHTLNHHR.S + Oxidation (M) |
| BCG0332      | 15.1 | ESX-3<br>secretion<br>system<br>protein<br>EccE3 | 22 | 3  | 1494.744<br>8 | 1493.737<br>5 | 1493.747<br>4 | -0.0099 | 0 | 0        | 6.3   | 4 | R.LDGHTDAPADLLTR.L                                       |
|              |      |                                                  |    |    | 1567.719<br>5 | 1566.712<br>2 | 1566.825<br>3 | -0.1131 | 0 | (0)      | 5.6   | 3 | R.VSANAELPDTLPAIR.S +<br>Deamidation (NQ)                |
|              |      |                                                  |    |    | 1611.770<br>0 | 1610.762<br>7 | 1610.874<br>0 | -0.1112 | 1 | 22       | 0.036 | 1 | R.SARIPLQETAQVAAR.R +<br>Deamidation (NQ)                |
| BCG2858<br>c | 10.4 | Ribosome-<br>binding<br>factor A                 | 21 | 1  | 1595.743<br>0 | 1594.735<br>7 | 1594.806<br>3 | -0.0705 | 0 | (16<br>) | 0.17  | 1 | R.DNGSVAQSPAPGGLGIR.T                                    |
| BCG2943      | 14.3 | Chromoso                                         | 41 | 11 | 929.5039      | 928.4966      | 928.4978      | -0.0011 | 0 | 1        | 6     | 7 | R.AAAIQADLR.D + Deamidation (NQ)                         |

|              |          |                                  |         |   |          |          |          |                                                                         |   |    |      |   |                                            |
|--------------|----------|----------------------------------|---------|---|----------|----------|----------|-------------------------------------------------------------------------|---|----|------|---|--------------------------------------------|
| c            |          | me<br>partition<br>protein smc   |         |   |          |          |          |                                                                         |   |    |      |   |                                            |
|              |          |                                  |         |   | 935.6146 | 934.6073 | 934.5824 | 0.0249                                                                  | 1 | 12 | 0.15 | 1 | R.LLAGRLHR.A                               |
|              |          |                                  |         |   | 1198.741 | 1197.733 | 1197.682 | 0.0510                                                                  | 1 | 1  | 3.7  | 6 | R.GVEVEARLAVR.T                            |
|              |          |                                  |         |   | 2        | 9        | 9        |                                                                         |   |    |      |   |                                            |
|              |          |                                  |         |   | 1215.689 | 1214.682 | 1214.655 | 0.0270                                                                  | 1 | 13 | 0.27 | 1 | R.QQRLAAMA AVR.D + Deamidation<br>(NQ)     |
|              |          |                                  |         |   | 6        | 3        | 3        |                                                                         |   |    |      |   |                                            |
|              |          |                                  |         |   | 1389.778 | 1388.771 | 1388.683 | 0.0883                                                                  | 1 | 5  | 2.6  | 1 | R.IEDAAMRAQQTR.A                           |
|              |          |                                  |         |   | 6        | 3        | 0        |                                                                         |   |    |      |   |                                            |
|              |          |                                  |         |   | 1623.753 | 1622.745 | 1622.753 | -0.0077                                                                 | 1 | 0  | 4.9  | 3 | R.AQQTRAEFETVQGR.I + 3<br>Deamidation (NQ) |
|              |          |                                  |         |   | 1        | 8        | 6        |                                                                         |   |    |      |   |                                            |
| 2581.205     | 2580.198 | 2580.285                         | -0.0867 | 1 | 0        | 6.1      | 1        | R.EMHVIVGQGKLEEILQSRPEDR.R<br>+ 2 Deamidation (NQ); Oxidation (M)       |   |    |      |   |                                            |
| 8            | 5        | 3                                |         |   |          |          |          |                                                                         |   |    |      |   |                                            |
| 2883.352     | 2882.345 | 2882.323                         | 0.0211  | 0 | 2        | 3.6      | 1        | R.QDAAEQALALNESDTAISAMYEQ<br>LGR.L + Deamidation (NQ); Oxidation<br>(M) |   |    |      |   |                                            |
| 3            | 0        | 9                                |         |   |          |          |          |                                                                         |   |    |      |   |                                            |
| 1452.702     | 1451.694 | 1451.730                         | -0.0355 | 0 | 7        | 0.86     | 5        | R.LHAAAVAAAVADCGR.L                                                     |   |    |      |   |                                            |
| 0            | 7        | 3                                |         |   |          |          |          |                                                                         |   |    |      |   |                                            |
| 1616.794     | 1615.787 | 1615.791                         | -0.0039 | 1 | 1        | 5.8      | 1        | R.AVDGASQLRDASAAQR.Q +<br>Deamidation (NQ)                              |   |    |      |   |                                            |
| 7            | 4        | 4                                |         |   |          |          |          |                                                                         |   |    |      |   |                                            |
| 1684.864     | 1683.857 | 1683.853                         | 0.0034  | 1 | 11       | 0.73     | 2        | R.QAEAAQRAAAIQADLR.D + 2<br>Deamidation (NQ)                            |   |    |      |   |                                            |
| 6            | 3        | 9                                |         |   |          |          |          |                                                                         |   |    |      |   |                                            |
| BCG2962<br>c | 6.2      | Mycocerosi<br>c acid<br>synthase | 35      | 9 | 972.5369 | 971.5296 | 971.5036 | 0.0261                                                                  | 0 | 10 | 0.81 | 3 | R.ANLEQAGLR.G + Deamidation<br>(NQ)        |
|              |          |                                  |         |   | 1046.595 | 1045.588 | 1045.566 | 0.0216                                                                  | 0 | 1  | 5.4  | 6 | R.EQPLPHGLR.G                              |
|              |          |                                  |         |   | 7        | 4        | 8        |                                                                         |   |    |      |   |                                            |

|              |      |                                                                                |    |   |               |               |               |         |   |    |      |   |                                                  |
|--------------|------|--------------------------------------------------------------------------------|----|---|---------------|---------------|---------------|---------|---|----|------|---|--------------------------------------------------|
|              |      |                                                                                |    |   | 1168.696<br>0 | 1167.688<br>7 | 1167.607<br>0 | 0.0817  | 0 | 5  | 1.6  | 3 | R.VISSEHPMLR.T                                   |
|              |      |                                                                                |    |   | 1187.679<br>7 | 1186.672<br>4 | 1186.609<br>4 | 0.0630  | 1 | 10 | 0.58 | 2 | R.DLIARWEQR.D + Deamidation (NQ)                 |
|              |      |                                                                                |    |   | 1287.637<br>8 | 1286.630<br>5 | 1286.709<br>4 | -0.0789 | 1 | 2  | 3.3  | 5 | R.GRDGVVIVYGPR.V                                 |
|              |      |                                                                                |    |   | 1428.696<br>4 | 1427.689<br>1 | 1427.803<br>0 | -0.1139 | 1 | 3  | 3.1  | 1 | K.LAAAGCGRIVLTAR.S +<br>Carbamidomethyl (C)      |
|              |      |                                                                                |    |   | 1586.801<br>3 | 1585.794<br>0 | 1585.857<br>6 | -0.0636 | 1 | 0  | 5.5  | 7 | R.RSVAVTPEQAPLYR.R                               |
|              |      |                                                                                |    |   | 1699.996<br>3 | 1698.989<br>0 | 1698.941<br>7 | 0.0474  | 1 | 6  | 1.5  | 1 | R.LVSERLLTLGWQQR.A +<br>Deamidation (NQ)         |
|              |      |                                                                                |    |   | 2145.102<br>1 | 2144.094<br>8 | 2143.969<br>1 | 0.1257  | 0 | 2  | 3.9  | 6 | R.AAGADIVVECGNIAEPDTADR.L +<br>Carboxymethyl (C) |
| BCG3661<br>c | 10.1 | Probable<br>ATP-<br>dependent<br>Clp<br>protease<br>ATP-<br>binding<br>subunit | 34 | 6 | 957.5175      | 956.5102      | 956.6018      | -0.0916 | 1 | 4  | 2.4  | 5 | K.KVLELSLR.E                                     |
|              |      |                                                                                |    |   | 1056.571<br>3 | 1055.564<br>0 | 1055.554<br>6 | 0.0094  | 1 | 7  | 1    | 5 | R.RMTAPPDLR.E                                    |
|              |      |                                                                                |    |   | 1199.692<br>0 | 1198.684<br>7 | 1198.655<br>7 | 0.0291  | 0 | 1  | 5.5  | 5 | R.EGEGVAAQVLVK.L                                 |
|              |      |                                                                                |    |   | 1362.744<br>4 | 1361.737<br>1 | 1361.722<br>4 | 0.0147  | 1 | 2  | 3.2  | 2 | K.SKDMALVLTDAAK.A                                |
|              |      |                                                                                |    |   | 1523.792<br>8 | 1522.785<br>5 | 1522.835<br>4 | -0.0499 | 1 | 18 | 0.1  | 1 | R.TKNNPVLIGEPGVGK.T +<br>Deamidation (NQ)        |
|              |      |                                                                                |    |   | 1691.839<br>6 | 1690.832<br>3 | 1690.855<br>9 | -0.0236 | 0 | 1  | 4.2  | 1 | R.VSITDAAMVAAATLADR.Y +<br>Oxidation (M)         |



|         |      |                                              |    |   |          |          |          |         |   |    |       |   |                                                               |  |  |
|---------|------|----------------------------------------------|----|---|----------|----------|----------|---------|---|----|-------|---|---------------------------------------------------------------|--|--|
| BCG1655 | 7.0  | Pyruvate kinase                              | 24 | 2 | 1301.734 | 1300.726 | 1300.583 | 0.1439  | 0 | 22 | 0.033 | 1 | R.ITVGACEGSHDR.V + Carbamidomethyl (C)                        |  |  |
|         |      |                                              |    |   | 1        | 8        | 0        |         |   |    |       |   |                                                               |  |  |
|         |      |                                              |    |   | 1792.933 | 1791.926 | 1791.936 | -0.0104 | 1 | 2  | 4.2   | 1 | R.LDAKALVAFTQSGDTR.R + Deamidation (NQ)                       |  |  |
|         |      |                                              |    |   | 5        | 2        | 6        |         |   |    |       |   |                                                               |  |  |
| BCG1633 | 8.3  | L-aspartate oxidase                          | 24 | 3 | 1015.519 | 1014.512 | 1014.618 | -0.1063 | 1 | 2  | 4     | 2 | R.AGRSVVLSK.A                                                 |  |  |
|         |      |                                              |    |   | 5        | 2        | 5        |         |   |    |       |   |                                                               |  |  |
|         |      |                                              |    |   | 1273.768 | 1272.761 | 1272.649 | 0.1117  | 0 | 11 | 0.48  | 1 | R.ALQDAAGMLDIR.T                                              |  |  |
|         |      |                                              |    |   | 6        | 3        | 6        |         |   |    |       |   |                                                               |  |  |
|         |      |                                              |    |   | 1678.877 | 1677.870 | 1677.722 | 0.1478  | 0 | 11 | 0.4   | 1 | R.GADDANAVCVQALVAVC.- + Carboxymethyl (C); 2 Deamidation (NQ) |  |  |
|         |      |                                              |    |   | 6        | 3        | 5        |         |   |    |       |   |                                                               |  |  |
| BCG3299 | 7.4  | Probable cation-transporting P-type ATPase C | 24 | 4 | 957.5175 | 956.5102 | 956.5767 | -0.0665 | 1 | 4  | 2.7   | 7 | R.RAISELLR.G                                                  |  |  |
|         |      |                                              |    |   | 1046.595 | 1045.588 | 1045.494 | 0.0943  | 0 | 1  | 5.1   | 5 | R.GNQDTAWVR.L                                                 |  |  |
|         |      |                                              |    |   | 7        | 4        | 1        |         |   |    |       |   |                                                               |  |  |
|         |      |                                              |    |   | 1368.723 | 1367.716 | 1367.832 | -0.1159 | 0 | 18 | 0.086 | 1 | R.MVIGGVALALLGVR.R                                            |  |  |
|         |      |                                              |    |   | 6        | 3        | 2        |         |   |    |       |   |                                                               |  |  |
|         |      |                                              |    |   | 1579.862 | 1578.855 | 1578.811 | 0.0437  | 1 | 1  | 5.2   | 9 | R.APHSAEIRNTDVL.R.M + Deamidation (NQ)                        |  |  |
|         |      |                                              |    |   | 3        | 0        | 4        |         |   |    |       |   |                                                               |  |  |
| BCG0946 | 13.0 | Hypothetical protein Mb0918                  | 23 | 3 | 843.5034 | 842.4961 | 842.4133 | 0.0828  | 0 | 3  | 3.2   | 7 | K.QPNQVVR.A + 3 Deamidation (NQ)                              |  |  |
|         |      |                                              |    |   | 2126.099 | 2125.092 | 2125.153 | -0.0610 | 1 | 11 | 0.5   | 2 | R.VPPLSLTNDAIELFVDRAR.R                                       |  |  |
|         |      |                                              |    |   | 4        | 1        | 1        |         |   |    |       |   |                                                               |  |  |
|         |      |                                              |    |   | 2131.155 | 2130.148 | 2130.133 | 0.0152  | 1 | 9  | 0.52  | 1 | K.SRLALQIGAQAHEFTYGR.W                                        |  |  |
|         |      |                                              |    |   | 8        | 5        | 3        |         |   |    |       |   |                                                               |  |  |

|              |          |                                                     |         |   |          |          |          |                                                                                |   |   |     |   |                                                                 |  |
|--------------|----------|-----------------------------------------------------|---------|---|----------|----------|----------|--------------------------------------------------------------------------------|---|---|-----|---|-----------------------------------------------------------------|--|
| BCG2112<br>c | 15.0     | Probable<br>helicase<br>helY                        | 23      | 9 | 1199.692 | 1198.684 | 1198.655 | 0.0290                                                                         | 0 | 8 | 1.1 | 1 | R.QVLDLLDQVR.N + Deamidation<br>(NQ)                            |  |
|              |          |                                                     |         |   | 0        | 7        | 7        |                                                                                |   |   |     |   |                                                                 |  |
|              |          |                                                     |         |   | 1380.658 | 1379.651 | 1379.690 | -0.0391                                                                        | 1 | 5 | 1.5 | 2 | R.ADEQAHRITPSR.E                                                |  |
|              |          |                                                     |         |   | 7        | 4        | 6        |                                                                                |   |   |     |   |                                                                 |  |
|              |          |                                                     |         |   | 1575.917 | 1574.910 | 1574.874 | 0.0364                                                                         | 1 | 2 | 3   | 1 | R.QALTQTSRLSTTLR.A                                              |  |
|              |          |                                                     |         |   | 7        | 4        | 0        |                                                                                |   |   |     |   |                                                                 |  |
|              |          |                                                     |         |   | 1701.965 | 1700.957 | 1700.866 | 0.0911                                                                         | 1 | 4 | 2.6 | 1 | R.WCRQVLDLLDQVR.N +<br>Carbamidomethyl (C); Deamidation<br>(NQ) |  |
|              |          |                                                     |         |   | 2        | 9        | 8        |                                                                                |   |   |     |   |                                                                 |  |
|              |          |                                                     |         |   | 2162.179 | 2161.172 | 2161.149 | 0.0231                                                                         | 1 | 2 | 3.7 | 4 | R.QVLDLLDQVRNAAPNPELR.A +<br>Deamidation (NQ)                   |  |
| 4            | 1        | 1                                                   |         |   |          |          |          |                                                                                |   |   |     |   |                                                                 |  |
| 2257.191     | 2256.184 | 2256.138                                            | 0.0459  | 1 | 0        | 5.1      | 2        | R.EFIDGPATDPVVTDDGRLAR.I                                                       |   |   |     |   |                                                                 |  |
| 7            | 4        | 6                                                   |         |   |          |          |          |                                                                                |   |   |     |   |                                                                 |  |
| 2995.451     | 2994.444 | 2994.494                                            | -0.0496 | 1 | 1        | 4.5      | 1        | K.LDAEGLLPITFVFSRAGCDAAVTQ<br>CLR.S + Carbamidomethyl (C);<br>Deamidation (NQ) |   |   |     |   |                                                                 |  |
| 9            | 6        | 2                                                   |         |   |          |          |          |                                                                                |   |   |     |   |                                                                 |  |
| 1184.672     | 1183.665 | 1183.703                                            | -0.0385 | 1 | 17       | 0.14     | 2        | R.SVVGLVRGIER.G                                                                |   |   |     |   |                                                                 |  |
| 4            | 1        | 6                                                   |         |   |          |          |          |                                                                                |   |   |     |   |                                                                 |  |
| 1448.718     | 1447.711 | 1447.750                                            | -0.0390 | 0 | 2        | 4.6      | 2        | R.GLAAHHAGMLPAFR.H                                                             |   |   |     |   |                                                                 |  |
| 9            | 6        | 6                                                   |         |   |          |          |          |                                                                                |   |   |     |   |                                                                 |  |
| BCG0716      | 8.4      | DNA-<br>directed<br>RNA<br>polymerase<br>beta chain | 22      | 7 | 1031.593 | 1030.585 | 1030.540 | 0.0450                                                                         | 1 | 7 | 1.2 | 1 | K.ISDGDKLAGR.H                                                  |  |
|              |          |                                                     |         |   | 0        | 7        | 7        |                                                                                |   |   |     |   |                                                                 |  |
|              |          |                                                     |         |   | 1133.617 | 1132.610 | 1132.554 | 0.0557                                                                         | 0 | 0 | 5.6 | 5 | M.LEGCILADSR.Q +<br>Carbamidomethyl (C)                         |  |
| 6            | 3        | 6                                                   |         |   |          |          |          |                                                                                |   |   |     |   |                                                                 |  |
| 1335.735     | 1334.728 | 1334.661                                            | 0.0667  | 1 | 12       | 0.32     | 2        | R.GAWLEFDVDKR.D                                                                |   |   |     |   |                                                                 |  |
| 8            | 5        | 9                                                   |         |   |          |          |          |                                                                                |   |   |     |   |                                                                 |  |

|          |      |                                      |    |   |               |               |               |         |   |    |       |   |                                           |
|----------|------|--------------------------------------|----|---|---------------|---------------|---------------|---------|---|----|-------|---|-------------------------------------------|
|          |      |                                      |    |   | 1388.779<br>9 | 1387.772<br>6 | 1387.709<br>5 | 0.0631  | 0 | 2  | 4.1   | 5 | K.ALGWTSEQIVER.F                          |
|          |      |                                      |    |   | 1542.806<br>4 | 1541.799<br>1 | 1541.804<br>9 | -0.0058 | 1 | 3  | 3.2   | 2 | K.GETELTPEERLLR.A                         |
|          |      |                                      |    |   | 1542.827<br>1 | 1541.819<br>8 | 1541.841<br>2 | -0.0214 | 1 | 5  | 2.1   | 1 | R.LRTVGELIQNQIR.V + 3<br>Deamidation (NQ) |
|          |      |                                      |    |   | 1692.834<br>4 | 1691.827<br>1 | 1691.849<br>1 | -0.0220 | 1 | 5  | 2.1   | 1 | R.AGLEVRDVHPSHYGR.M                       |
| BCG0123  | 4.3  | Uncharacterized protein Mb0093       | 22 | 1 | 944.5690      | 943.5617      | 943.5087      | 0.0531  | 0 | 22 | 0.053 | 1 | R.GAIQATLDR.D                             |
| BCG2433c | 22.9 | Hypothetical UPF0230 protein Mb2440c | 21 | 4 | 1349.749<br>6 | 1348.742<br>3 | 1348.692<br>1 | 0.0503  | 0 | 3  | 2.9   | 4 | R.SAAMGVGFAALAAGR.A                       |
|          |      |                                      |    |   | 1368.723<br>6 | 1367.716<br>3 | 1367.740<br>8 | -0.0245 | 0 | 8  | 0.89  | 3 | R.AAELTAAELGPAVR.V                        |
|          |      |                                      |    |   | 1508.679<br>1 | 1507.671<br>8 | 1507.726<br>7 | -0.0548 | 1 | 7  | 1.3   | 2 | R.DGVDEIPDDIHKR.H                         |
|          |      |                                      |    |   | 1601.905<br>8 | 1600.898<br>5 | 1600.930<br>0 | -0.0315 | 0 | 4  | 2.3   | 3 | R.QVPLHILLDGLDLR.D                        |
| BCG1872c | 8.9  | Malate synthase G                    | 23 | 4 | 1199.692<br>0 | 1198.684<br>7 | 1198.598<br>2 | 0.0865  | 0 | 2  | 5.1   | 4 | K.ELAWAPDEIR.E                            |
|          |      |                                      |    |   | 1268.744<br>5 | 1267.737<br>2 | 1267.663<br>3 | 0.0740  | 1 | 5  | 1.6   | 1 | K.ARAAEKPAPSDR.A                          |
|          |      |                                      |    |   | 2763.327<br>4 | 2762.320<br>1 | 2762.456<br>2 | -0.1361 | 1 | 2  | 3.7   | 4 | K.VVADLTPQNQALLNARDELQAQID<br>K.W         |

|          |      |                                               |    |   |               |               |               |         |   |    |       |   |                                                            |
|----------|------|-----------------------------------------------|----|---|---------------|---------------|---------------|---------|---|----|-------|---|------------------------------------------------------------|
|          |      |                                               |    |   | 1301.700<br>8 | 1300.693<br>5 | 1300.713<br>9 | -0.0204 | 0 | 23 | 0.036 | 1 | R.ISSQLLANWLR.H + Deamidation (NQ)                         |
| BCG3470  | 15.3 | Hypothetical glycosyl hydrolase Rv3401/MT3509 | 21 | 2 | 1599.740<br>0 | 1598.732<br>7 | 1598.892<br>6 | -0.1599 | 1 | 4  | 3.1   | 1 | R.TTVICGLRPGQKLR.I + Carbamidomethyl (C); Deamidation (NQ) |
|          |      |                                               |    |   | 2333.133<br>5 | 2332.126<br>2 | 2332.146<br>7 | -0.0205 | 0 | 18 | 0.066 | 1 | R.IVTGDGSLEEECGLAVLIETAR.L + Carboxymethyl (C)             |
| BCG0535c | 3.0  | Hypothetical protein Rv0493c/MT0513           | 21 | 1 | 956.4260      | 955.4187      | 955.5352      | -0.1164 | 1 | 21 | 0.039 | 1 | R.SAALPRWR.G                                               |
| BCG1479  | 10.1 | Putative lipoprotein lprH precursor           | 20 | 2 | 989.5793      | 988.5720      | 988.4695      | 0.1026  | 0 | 16 | 0.17  | 1 | M.ACLGRPGCR.G + Carbamidomethyl (C)                        |
|          |      |                                               |    |   | 1091.621<br>1 | 1090.613<br>8 | 1090.540<br>7 | 0.0731  | 0 | 5  | 1.8   | 1 | R.APFGQVTQSR.V + Deamidation (NQ)                          |
| BCG0447  | 8.3  | Phosphate acetyltransferase                   | 20 | 4 | 901.5200      | 900.5127      | 900.5141      | -0.0013 | 1 | 2  | 4.2   | 9 | K.SAGRLLQR.G + Deamidation (NQ)                            |
|          |      |                                               |    |   | 929.5039      | 928.4966      | 928.4978      | -0.0011 | 0 | 9  | 1     | 2 | R.KPVNDLSR.G + Deamidation (NQ)                            |
|          |      |                                               |    |   | 1600.814<br>3 | 1599.807<br>0 | 1599.920<br>8 | -0.1138 | 1 | 5  | 1.8   | 1 | K.VGVFRPITRLSAER.D                                         |
|          |      |                                               |    |   | 1877.873<br>4 | 1876.866<br>1 | 1877.084<br>6 | -0.2185 | 1 | 4  | 2.6   | 1 | K.AVQRSAGAIAIGPVLQGLR.K + Deamidation (NQ)                 |
| BCG2596  | 17.9 | Putative 2-dehydrophosphate 2-reductase       | 25 | 3 | 1307.706<br>1 | 1306.698<br>8 | 1306.681<br>5 | 0.0173  | 1 | 3  | 4.1   | 1 | R.RYVAECLAVAR.A                                            |
|          |      |                                               |    |   | 1363.680<br>3 | 1362.673<br>0 | 1362.715<br>6 | -0.0426 | 0 | 25 | 0.021 | 1 | R.AAHRPLEWDLR.N                                            |

|                         |      |                                       |    |   |               |               |               |         |   |    |       |   |                                                           |
|-------------------------|------|---------------------------------------|----|---|---------------|---------------|---------------|---------|---|----|-------|---|-----------------------------------------------------------|
|                         |      |                                       |    |   | 1733.916<br>5 | 1732.909<br>2 | 1732.965<br>7 | -0.0565 | 1 | 1  | 6.6   | 3 | K.LLVNALAGFMVLSGRR.S +<br>Deamidation (NQ); Oxidation (M) |
| BCG2216<br>c            | 9.9  | Cytochrom<br>e c oxidase<br>subunit 2 | 24 | 3 | 927.4753      | 926.4680      | 926.5045      | -0.0365 | 1 | 24 | 0.016 | 1 | R.GSGGPARGLR.Q                                            |
|                         |      |                                       |    |   | 1024.470<br>5 | 1023.463<br>2 | 1023.534<br>9 | -0.0716 | 1 | 2  | 2.1   | 1 | R.RGELAPQPVG.- + Deamidation<br>(NQ)                      |
|                         |      |                                       |    |   | 1187.634<br>6 | 1186.627<br>3 | 1186.630<br>6 | -0.0032 | 1 | 0  | 7.8   | 9 | R.IDGKTNAEALR.A                                           |
| BCG0006<br>;<br>BCG0036 | 6.3  | DNA<br>gyrase<br>subunit A            | 22 | 4 | 941.5762      | 940.5689      | 940.5705      | -0.0016 | 0 | 22 | 0.024 | 1 | R.IAQVIQIR.G + Deamidation (NQ)                           |
|                         |      |                                       |    |   | 985.5170      | 984.5097      | 984.5716      | -0.0618 | 0 | 15 | 0.18  | 2 | R.SGGIVAVNLR.D                                            |
|                         |      |                                       |    |   | 1419.645<br>4 | 1418.638<br>1 | 1418.715<br>3 | -0.0772 | 1 | 2  | 3.6   | 2 | K.RTAIEEYPVQGR.G + Deamidation<br>(NQ)                    |
|                         |      |                                       |    |   | 1587.729<br>6 | 1586.722<br>3 | 1586.833<br>7 | -0.1114 | 0 | 2  | 4.3   | 5 | R.LMNLGEGDTLLAIAR.N +<br>Deamidation (NQ)                 |
| BCG2562<br>c            | 10.7 | Chorismate<br>synthase                | 20 | 3 | 1030.616<br>0 | 1029.608<br>7 | 1029.581<br>8 | 0.0269  | 0 | 20 | 0.084 | 1 | R.DAVTVLSGIR.H                                            |
|                         |      |                                       |    |   | 1249.602<br>1 | 1248.594<br>8 | 1248.609<br>8 | -0.0150 | 0 | 3  | 4.2   | 5 | K.GVEIGDGFQTAR.R                                          |
|                         |      |                                       |    |   | 1457.748<br>2 | 1456.740<br>9 | 1456.709<br>2 | 0.0317  | 0 | 3  | 4.4   | 3 | R.AGGLEGGMTNGQPLR.V                                       |
| BCG1085<br>c            | 3.6  | Sensor<br>protein<br>kdpD             | 23 | 2 | 1419.680<br>4 | 1418.673<br>1 | 1418.708<br>8 | -0.0357 | 1 | 4  | 2.2   | 1 | R.YAPDCVVRVNAGR.V                                         |
|                         |      |                                       |    |   | 1567.869<br>9 | 1566.862<br>6 | 1566.880<br>3 | -0.0177 | 1 | 18 | 0.1   | 1 | K.TAKLLEGIEMIPPR.Y                                        |



|          |      |                                                     |    |   |           |           |           |         |   |     |       |   |                                                           |
|----------|------|-----------------------------------------------------|----|---|-----------|-----------|-----------|---------|---|-----|-------|---|-----------------------------------------------------------|
|          |      |                                                     |    |   | 4         | 1         | 1         |         |   |     |       |   |                                                           |
|          |      |                                                     |    |   | 1483.6919 | 1482.6846 | 1482.7426 | -0.0580 | 1 | 2   | 2.5   | 1 | R.ELNPDRLLIDNQR.D + Deamidation (NQ)                      |
| Mb2007c  | 17.2 | Putative HTH-type transcriptional regulator Mb2007c | 26 | 3 | 1452.7020 | 1451.6947 | 1451.7481 | -0.0533 | 1 | 13  | 0.23  | 1 | R.IEDQDHSARLLR.E                                          |
|          |      |                                                     |    |   | 1682.8820 | 1681.8747 | 1681.9297 | -0.0550 | 1 | 24  | 0.025 | 1 | R.EKPCRATTAGIPLLR.L + Carbamidomethyl (C)                 |
|          |      |                                                     |    |   | 2017.9869 | 2016.9796 | 2016.9356 | 0.0440  | 1 | 4   | 2.5   | 1 | R.EGVAMGAVTTERNPVPGCR.V + Deamidation (NQ); Oxidation (M) |
| BCG2636c | 5.2  | Phosphatidylinositol mannoside acyltransferase      | 23 | 3 | 1363.6094 | 1362.6021 | 1362.6383 | -0.0362 | 1 | 13  | 0.11  | 1 | R.NNRVVCLMAER.D + 2 Deamidation (NQ)                      |
|          |      |                                                     |    |   | 1389.6616 | 1388.6543 | 1388.6472 | 0.0071  | 1 | 6   | 1.7   | 1 | R.NAFDTGARYFAR.H + Deamidation (NQ)                       |
|          |      |                                                     |    |   | 2199.9509 | 2198.9436 | 2199.0531 | -0.1094 | 1 | 4   | 1.1   | 1 | R.SSVTRTATDWAYAAGWMAVR.A                                  |
| BCG2500c | 7.2  | Glycerol-3-phosphate acyltransferase                | 22 | 5 | 1046.5651 | 1045.5578 | 1045.5404 | 0.0175  | 0 | 3   | 2.6   | 4 | K.QSPVSTSALR.L + Deamidation (NQ)                         |
|          |      |                                                     |    |   | 1435.7166 | 1434.7093 | 1434.7554 | -0.0460 | 1 | 0   | 5.5   | 4 | R.VAAFWAQAMRLR.D + Oxidation (M)                          |
|          |      |                                                     |    |   | 1466.7225 | 1465.7152 | 1465.7313 | -0.0161 | 1 | (1) | 5.8   | 3 | K.RFNLSWSIEGTR.S + Deamidation (NQ)                       |
|          |      |                                                     |    |   | 1659.7863 | 1658.7790 | 1658.7973 | -0.0183 | 0 | 4   | 2.6   | 1 | K.LGLMSYVADAYLDGR.S + Oxidation (M)                       |
|          |      |                                                     |    |   | 1909.9203 | 1908.9130 | 1908.9792 | -0.0662 | 0 | 2   | 3.8   | 1 | R.QVAVDQELIAPAADLAER.R + Deamidation (NQ)                 |

|          |      |                                                 |    |   |          |          |          |         |   |      |       |   |                                                        |
|----------|------|-------------------------------------------------|----|---|----------|----------|----------|---------|---|------|-------|---|--------------------------------------------------------|
| BCG3639  | 17.1 | HTH-type transcriptional repressor KstR         | 21 | 2 | 1648.778 | 1647.770 | 1647.807 | -0.0363 | 1 | 7    | 0.97  | 2 | R.AMQRNPLLTEAMTR.A + Deamidation (NQ); Oxidation (M)   |
|          |      |                                                 |    |   | 2        | 9        | 2        |         |   |      |       |   |                                                        |
|          |      |                                                 |    |   | 1819.807 | 1818.800 | 1818.784 | 0.0160  | 0 | (3)  | 1.5   | 1 | R.AMANGEPTEDQYHIAR.V + Deamidation (NQ); Oxidation (M) |
|          |      |                                                 |    |   | 5        | 2        | 2        |         |   |      |       |   |                                                        |
| BCG2891c | 11.1 | Putative zinc metalloprotease Rv2869c/M T2937   | 21 | 3 | 1127.576 | 1126.568 | 1126.548 | 0.0206  | 1 | 1    | 4.3   | 1 | R.AMYKQATWK.R + Deamidation (NQ)                       |
|          |      |                                                 |    |   | 0        | 7        | 1        |         |   |      |       |   |                                                        |
|          |      |                                                 |    |   | 1254.667 | 1253.659 | 1253.720 | -0.0606 | 1 | 18   | 0.07  | 3 | K.VGALVRAIGGGQR.D + Deamidation (NQ)                   |
|          |      |                                                 |    |   | 0        | 7        | 3        |         |   |      |       |   |                                                        |
|          |      |                                                 |    |   | 1751.811 | 1750.804 | 1750.819 | -0.0149 | 0 | 2    | 3.9   | 1 | K.VGDTPVSSFDEMAAAVR.K                                  |
|          |      |                                                 |    |   | 9        | 6        | 5        |         |   |      |       |   |                                                        |
| BCG0602  | 4.2  | GDP-mannose-dependent alpha-mannosyltransferase | 20 | 1 | 1466.757 | 1465.750 | 1465.723 | 0.0266  | 0 | (19) | 0.095 | 1 | R.LQSAMPTAVFTGAR.Y + Deamidation (NQ); Oxidation (M)   |
|          |      |                                                 |    |   | 3        | 0        | 5        |         |   | )    |       |   |                                                        |
| BCG3940c | 8.8  | ESX-2 secretion system protein EccE2            | 19 | 3 | 1287.640 | 1286.633 | 1286.669 | -0.0360 | 1 | 12   | 0.33  | 1 | R.RLGSDAVAGSAQR.W                                      |
|          |      |                                                 |    |   | 3        | 0        | 1        |         |   |      |       |   |                                                        |
|          |      |                                                 |    |   | 1401.680 | 1400.673 | 1400.733 | -0.0598 | 0 | 4    | 2.2   | 1 | R.LMIPVTDAGELSR.V                                      |
|          |      |                                                 |    |   | 8        | 5        | 3        |         |   |      |       |   |                                                        |
|          |      |                                                 |    |   | 1795.877 | 1794.870 | 1794.937 | -0.0675 | 1 | 3    | 4     | 2 | R.RPVKWNDPITLANNR.S + 2 Deamidation (NQ)               |
|          |      |                                                 |    |   | 4        | 1        | 6        |         |   |      |       |   |                                                        |
| BCG0733  | 5.3  | Elongation factor G                             | 19 | 2 | 943.6120 | 942.6047 | 942.5862 | 0.0186  | 1 | 1    | 1.9   | 1 | K.IAGSQVLKK.A                                          |
|          |      |                                                 |    |   |          |          |          |         |   |      |       |   |                                                        |
|          |      |                                                 |    |   | 1091.542 | 1090.535 | 1090.540 | -0.0054 | 1 | 14   | 0.23  | 1 | R.QADKYDVPR.I                                          |



|              |     |                                       |    |   | 6             | 3             | 7             |         |   |    |     |   |                                                               |
|--------------|-----|---------------------------------------|----|---|---------------|---------------|---------------|---------|---|----|-----|---|---------------------------------------------------------------|
|              |     |                                       |    |   | 1433.734<br>0 | 1432.726<br>7 | 1432.672<br>8 | 0.0539  | 1 | 4  | 2.7 | 2 | R.GQIQAMEERAGAR.V +<br>Deamidation (NQ); Oxidation (M)        |
| BCG3025<br>c | 5.3 | Acetolactat<br>e synthase             | 20 | 2 | 1370.726<br>6 |               | 1370.757<br>2 | -0.0306 | 0 | 10 |     | 1 | VALINNGNLGMVR                                                 |
|              |     |                                       |    |   | 2039.025<br>3 |               | 2039.016      | 0.0093  | 0 | 10 |     | 1 | QNLGMPGMHGTVAAVAALQR +<br>Deamidation (NQ) + Oxidation (M)    |
| BCG1667      | 4.5 | DNA<br>polymerase<br>I                | 17 | 2 | 3388.539<br>8 |               | 3388.623<br>8 | -0.084  | 0 | 17 |     | 1 | AETPQQQLSLLDDDDTDAETIQTILRA<br>R + Deamidation (NQ)           |
|              |     |                                       |    |   | 1240.682<br>3 |               | 1240.570<br>6 | 0.1117  | 0 |    |     | 6 | QWLAEHAGDGR + Deamidation (NQ)                                |
| BCG2921<br>c | 5.1 | Hypothetic<br>al protein<br>Mb2924c   | 17 | 2 | 1893.945<br>8 |               | 1893.934<br>3 | 0.0115  | 0 | 11 |     | 1 | AVMVSLQRGMQQMGALR +<br>Deamidation (NQ) + Oxidation (M)       |
|              |     |                                       |    |   | 2309.074      |               | 2309.123<br>8 | -0.0498 | 0 | 6  |     | 1 | GMIGKPGAGVCPVRGHSNVQGDR +<br>Deamidation (NQ) + Oxidation (M) |
| BCG1855      | 3.5 | Probable<br>acetolactat<br>e synthase |    | 2 | 1459.708<br>7 |               | 1459.659<br>4 | 0.0493  | 0 | 9  |     | 1 | STDTAPAQTMHAGR + Oxidation (M)                                |
|              |     |                                       |    |   | 2028.028<br>7 |               | 2028.011<br>4 | 0.0173  | 0 | 4  |     | 1 | MSTDTAPAQTMHAGR LIAR                                          |
| BCG3770      | 6.6 | 2-<br>isopropylm<br>alate<br>synthase | 37 | 7 | 1637.924<br>1 |               | 1637.774      | 0.1501  | 0 | 2  |     | 1 | CVEQAAKYPGTQWR + Deamidation<br>(NQ)                          |
|              |     |                                       |    |   | 1719.028<br>1 |               | 1718.823<br>1 | 0.205   | 0 | 10 |     | 2 | GVDPQIDFSNIDEIR + Deamidation<br>(NQ)                         |
|              |     |                                       |    |   | 1719.903<br>3 |               | 1719.807<br>1 | 0.0962  | 0 | 2  |     | 3 | GVDPQIDFSNIDEIR + 2Deamidation<br>(NQ)                        |
|              |     |                                       |    |   | 2014.107<br>1 |               | 2013.944<br>7 | 0.1624  | 0 | 1  |     | 4 | VGQPSWNPQRASSMPVNR +<br>2Deamidation (NQ)                     |
|              |     |                                       |    |   | 907.4709      |               | 907.4421      | 0.0288  | 0 | 9  |     | 1 | YPGTQWR                                                       |
|              |     |                                       |    |   | 944.5059      |               | 944.4697      | 0.0362  | 0 | 10 |     | 1 | NRTWPDR                                                       |
|              |     |                                       |    |   | 1874.929      |               | 1874.924      | 0.0053  | 0 | 13 |     | 1 | GVDPQIDFSNIDEIRR                                              |

|              |      |                                                          |    |   |               |  |               |         |   |    |  |   |                                        |
|--------------|------|----------------------------------------------------------|----|---|---------------|--|---------------|---------|---|----|--|---|----------------------------------------|
|              |      |                                                          |    |   | 6             |  | 3             |         |   |    |  |   |                                        |
| BCG0391      | 6.3  | Chaperone protein dnaJ1                                  |    | 2 | 1336.731<br>3 |  | 1336.733<br>2 | -0.0019 | 0 | 2  |  | 1 | IPPGVEDGQRIR                           |
|              |      |                                                          |    |   | 1377.767<br>8 |  | 1377.625      | 0.1428  | 0 | 12 |  | 1 | VCPTCNGSGVINR + Carboxymethyl [C]      |
| BCG0992      | 3.4  | Putative DNA-ligase like protein Mb0963                  |    | 2 | 1412.661<br>1 |  | 1412.749<br>3 | -0.0882 | 0 | 11 |  | 2 | LDADAPVADRLTR                          |
|              |      |                                                          |    |   | 1563.890<br>6 |  | 1563.849      | 0.0416  | 0 | 2  |  | 1 | QLSYDEVLTRIAR                          |
| BCG0957      | 14.8 | Probable enoyl-CoA hydratase echA6                       |    | 3 | 1799.927<br>5 |  | 1799.949<br>7 | -0.0222 | 0 | 4  |  | 6 | NALNSQLVEELTQAIR + Deamidation (NQ)    |
|              |      |                                                          |    |   | 1956.941<br>5 |  | 1957.034<br>9 | -0.0934 | 0 | 8  |  | 1 | RNALNSQLVEELTQAIR + Deamidation (NQ)   |
|              |      |                                                          |    |   | 2163.035<br>2 |  | 2163.071<br>5 | -0.0363 | 0 | 1  |  | 2 | ELFDKAWGSQDVIEAQVAR + Deamidation (NQ) |
| BCG1671      | 4.7  | UvrABC system protein B (UvrB protein)                   | 36 | 2 | 1799.824<br>8 |  | 1799.892<br>2 | -0.0674 | 0 | 15 |  | 2 | QIAYNEANGIDPQPLR + Deamidation (NQ)    |
|              |      |                                                          |    |   | 1957.041      |  | 1957.122<br>9 | -0.0819 | 0 | 21 |  | 1 | QLRLGDYDVLVGINLLR                      |
| BCG0976<br>c | 7.0  | Probable manganese transport protein mntH                | 33 | 2 | 1609.738<br>8 |  | 1609.829<br>2 | -0.0904 | 0 | 16 |  | 1 | RSPELSHTDGLIER                         |
|              |      |                                                          |    |   | 1784.838<br>6 |  | 1784.907<br>2 | -0.0686 | 0 | 17 |  | 1 | SSGIMREHGVQVDTLR                       |
| BCG1389<br>c | 3.3  | Alpha-1,4-glucan:maltose-1-phosphate maltosyltransferase | 32 | 2 | 1570.863<br>4 |  | 1570.942<br>7 | -0.0793 | 0 | 16 |  | 1 | SLQPFITRLNIIR                          |
|              |      |                                                          |    |   | 2024.116<br>5 |  | 2024.008<br>3 | 0.1082  | 1 | 17 |  | 1 | DFASALDQGRSLQPFITR + Deamidation (NQ)  |
| BCG2870<br>c | 4.5  | Uncharacterized                                          | 32 | 2 | 1515.763<br>4 |  | 1515.764<br>9 | -0.0015 |   | 13 |  | 1 | ATVDDVVLGDNELR                         |

|         |     |                                                         |    |   |               |  |               |         |  |    |  |   |                               |
|---------|-----|---------------------------------------------------------|----|---|---------------|--|---------------|---------|--|----|--|---|-------------------------------|
|         |     | protein Rv2850c/MT2916                                  |    |   | 1611.77       |  | 1611.758<br>4 | 0.0116  |  | 19 |  | 2 | RMAYEADPDAFVAR                |
| BCG2957 | 2.4 | Phthiocerol synthesis polyketide synthase type I PpsE   | 30 | 2 | 1631.805<br>5 |  | 1631.824<br>3 | -0.0188 |  | 19 |  | 1 | MSIPENAIIVGMAGR+Oxidation (M) |
|         |     |                                                         |    |   | 2227.175<br>3 |  | 2227.151<br>4 | 0.0239  |  | 11 |  | 2 | HNVTMAAVVHDREHAATVLR          |
| BCG3443 | 5.2 | Putative diacylglycerol O-acyltransferase Rv3371/MT3481 | 30 | 2 | 989.5697      |  | 989.5526      | 0.0171  |  | 13 |  | 1 | YQAVRVPR + Deamidation (NQ)   |
|         |     |                                                         |    |   | 1725.815<br>8 |  | 1725.939<br>5 | -0.1237 |  | 16 |  | 1 | RVALPRPGDEAELFR               |

**Table S3:** Primers used in the study.

| Gene     |    | Primers (5'→3')      | Melting Temperature | Amplicon length |
|----------|----|----------------------|---------------------|-----------------|
| 16S rRNA | FP | TAGGCGTTCCTTGTGGC    | 62.18               | 142             |
|          | RP | CAGTCTCTCACGAGTCCC   | 62.18               |                 |
| BCG0946  | FP | CGCTGTTACGTTCTGTCC   | 62.32               | 212             |
|          | RP | GTCCAAGCGTCGGCAGAT   | 62.18               |                 |
| BCG2433c | FP | GATGGGCGTCGGTTTCG    | 62.02               | 268             |
|          | RP | CGTCGCGTTGCTCACAG    | 62.02               |                 |
| BCG2654c | FP | GTGCATGGGACGGCTCAA   | 62.18               | 248             |
|          | RP | ATCTTGACGGTGTGGCGG   | 62.18               |                 |
| BCG3756c | FP | GCTGGGTTATCTACGGGTTG | 62.45               | 213             |
|          | RP | ATGAGCGCGACGAGGTG    | 62.02               |                 |
| BCG3226c | FP | GGTCAGCAGTTTGGTGGAG  | 62.32               | 157             |
|          | RP | CAGGTCAAACAGCAGTTCAG | 60.4                |                 |
| BCG0932  | FP | GGGTGCGTTGGCGATTC    | 62                  | 104             |
|          | RP | CGATGGGGTGTGGGG      | 61.6                |                 |
| BCG3932  | FP | TAGTGATCGGATCGGTCTTC | 60.4                | 203             |
|          | RP | GGGTAGCGGTGAGGGGT    | 64                  |                 |
| BCG3940c | FP | CGCAGCTAGTCACCGAGAT  | 62.32               | 150             |
|          | RP | GAATCACGATCCTCTTGGC  | 60.18               |                 |
| BCG0332  | FP | ATCGGTTGGGAGGCTGGT   | 62                  | 149             |
|          | RP | GTATCGGGCAACTCGGCA   | 62                  |                 |

Primers used for the qRT-PCR of the mycobacterial genes.

| Primers for cloning VapC48 into pVV16 |    | Primers (5'→3')              | Melting Temperature |
|---------------------------------------|----|------------------------------|---------------------|
| Forward primer with <i>NdeI</i>       | FP | ATCTCATATGAGCGAAACCTTTGACG   | 65                  |
| Reverse primer with <i>HindIII</i>    | RP | ACTCGGATCCAGCCGAGAAGGGGTC    | 61                  |
| Primers for cloning IdeR into pVV16   |    | Primers (5'→3')              | Melting Temperature |
| Forward primer with <i>NdeI</i>       | FP | ATATATATGAACGAGCTGGTTGAT     | 52.2                |
| Reverse primer with <i>HindIII</i>    | RP | TATAAGCTTTCAGACTTTTTTCGACCTT | 56.9                |

Primers used for cloning of VapC48 gene into pVV16 shuttle vector.
